# Supplementary material for: An efficient catalysis for the synthesis of pyrimido[1,2-a]benzimidazoles and 1-(benzothiazolylamino)methyl-2-naphthols using ZnO@SO3H@Tropine
Source: Royal Society of Chemistry journal article supplement (doi:10.1039/d3ra08960f), 2024-01-01
Supplement: d3ra08960f1.pdf [file d3ra08960f1.pdf]

An efficient catalysis for the synthesis of pyrimido[1,2-*a*]benzimidazoles and 1-(benzothiazolylamino) methyl-2-naphthols using ZnO@SO<sub>3</sub>H@Tropine.

Fatemeh Rahimizadeh, Masoumeh Mazloumi, Farhad Shirini \*

\* Department of Chemistry, College of Science, University of Guilan, Rasht, 41335-19141, Iran.

\*F.shirini (✉)Department of Chemistry, College of Science, University of Guilan, Rasht, 41335-19141, Iran. Tel./Fax: +98 131 3233262. E-mail: shirini@guilan.ac.ir (and also fshirini@gmail.com)

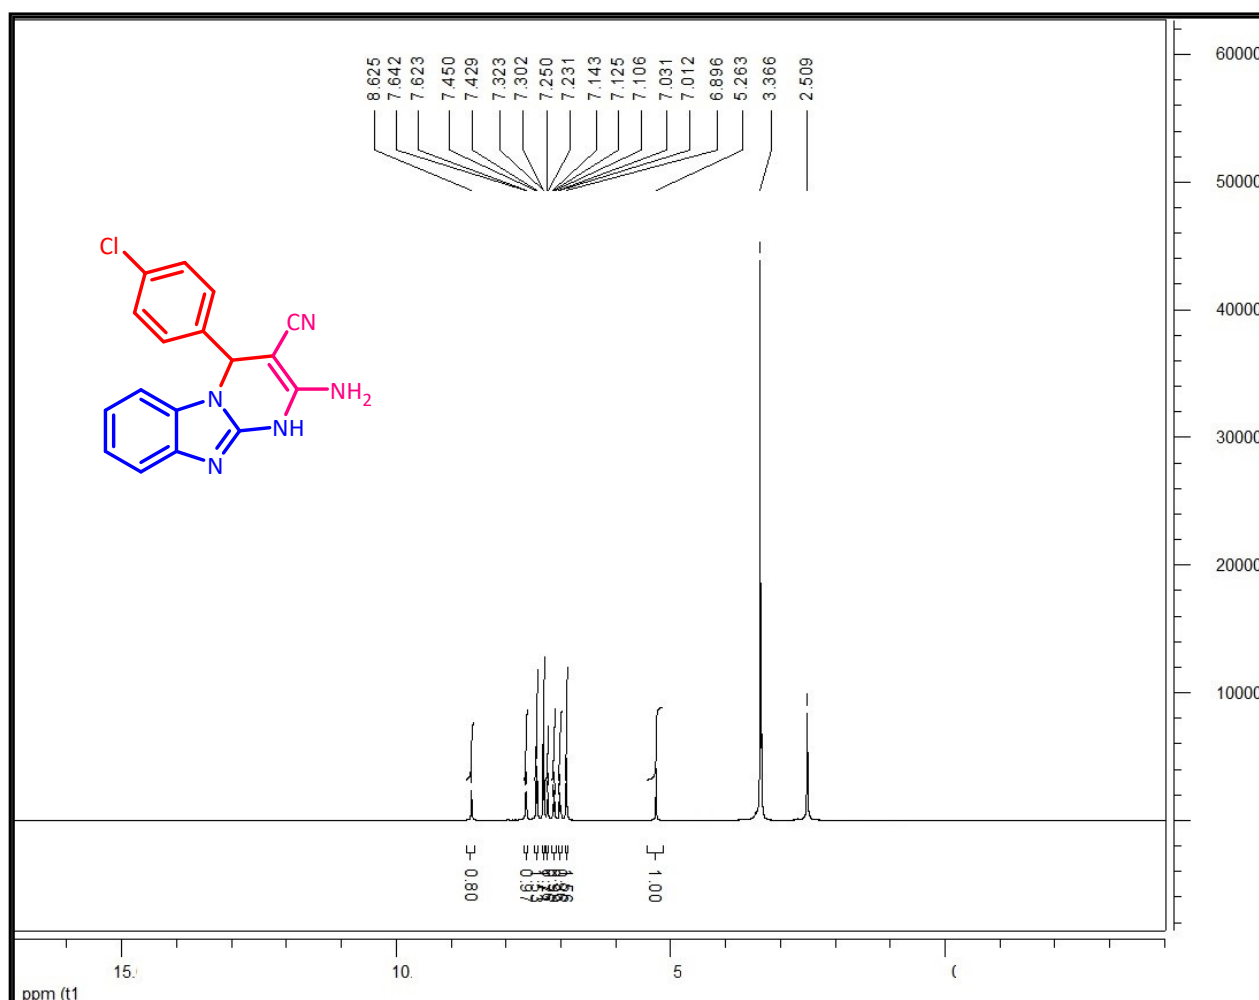

Figure 1: The <sup>1</sup>H NMR spectrum of 2-amino-4-(4-chlorophenyl)-1,4-dihydrobenzo[4,5]imidazo[1,2-*a*]pyrimidine-3-carbonitrile.

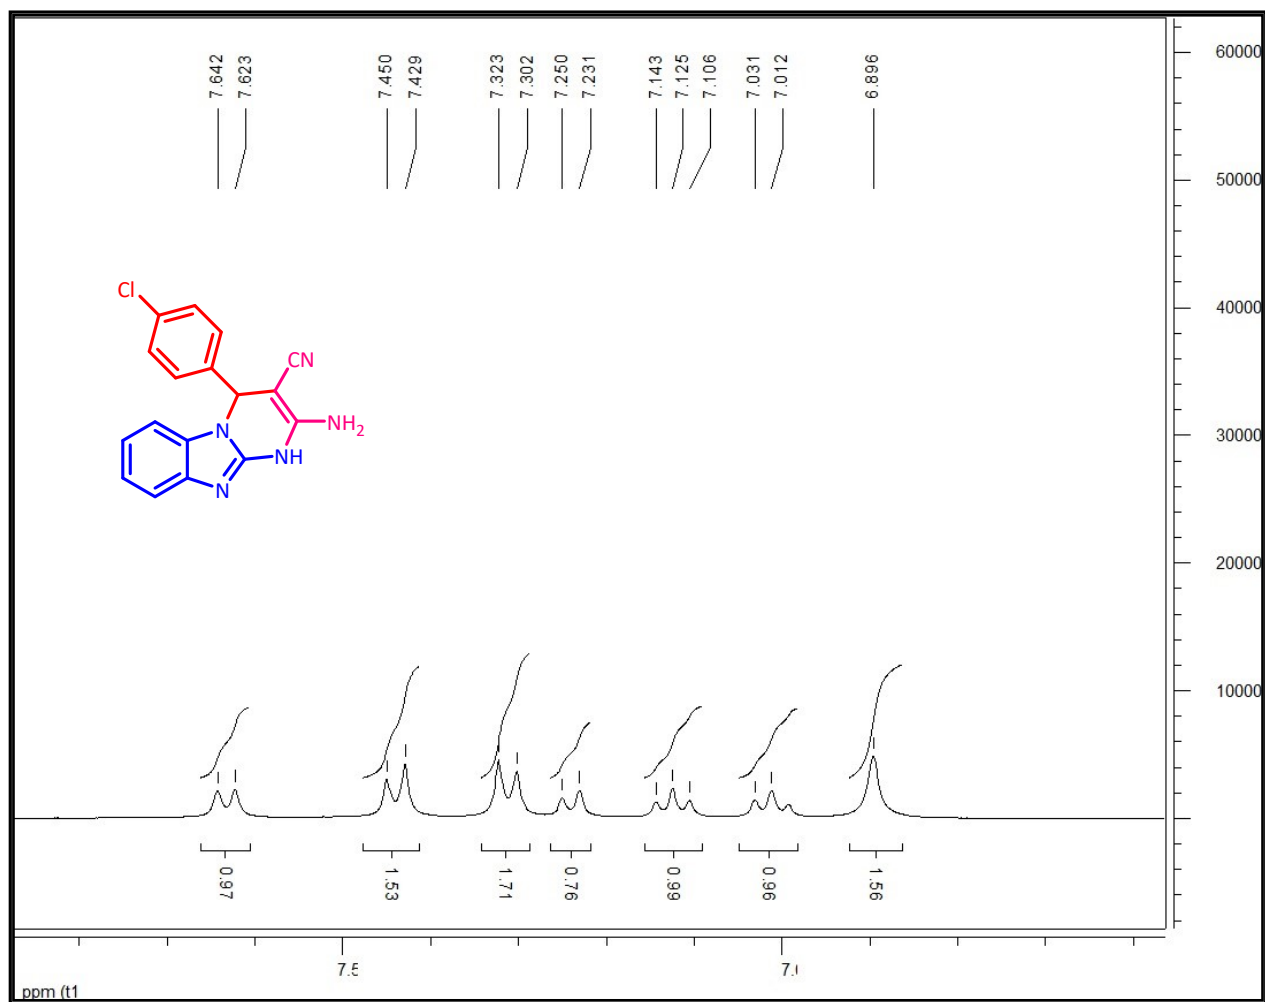

Figure 2: The <sup>1</sup>H NMR spectrum of 2-amino-4-(4-chlorophenyl)-1,4-dihydrobenzo[4,5]imidazo[1,2-a]pyrimidine-3-carbonitrile.

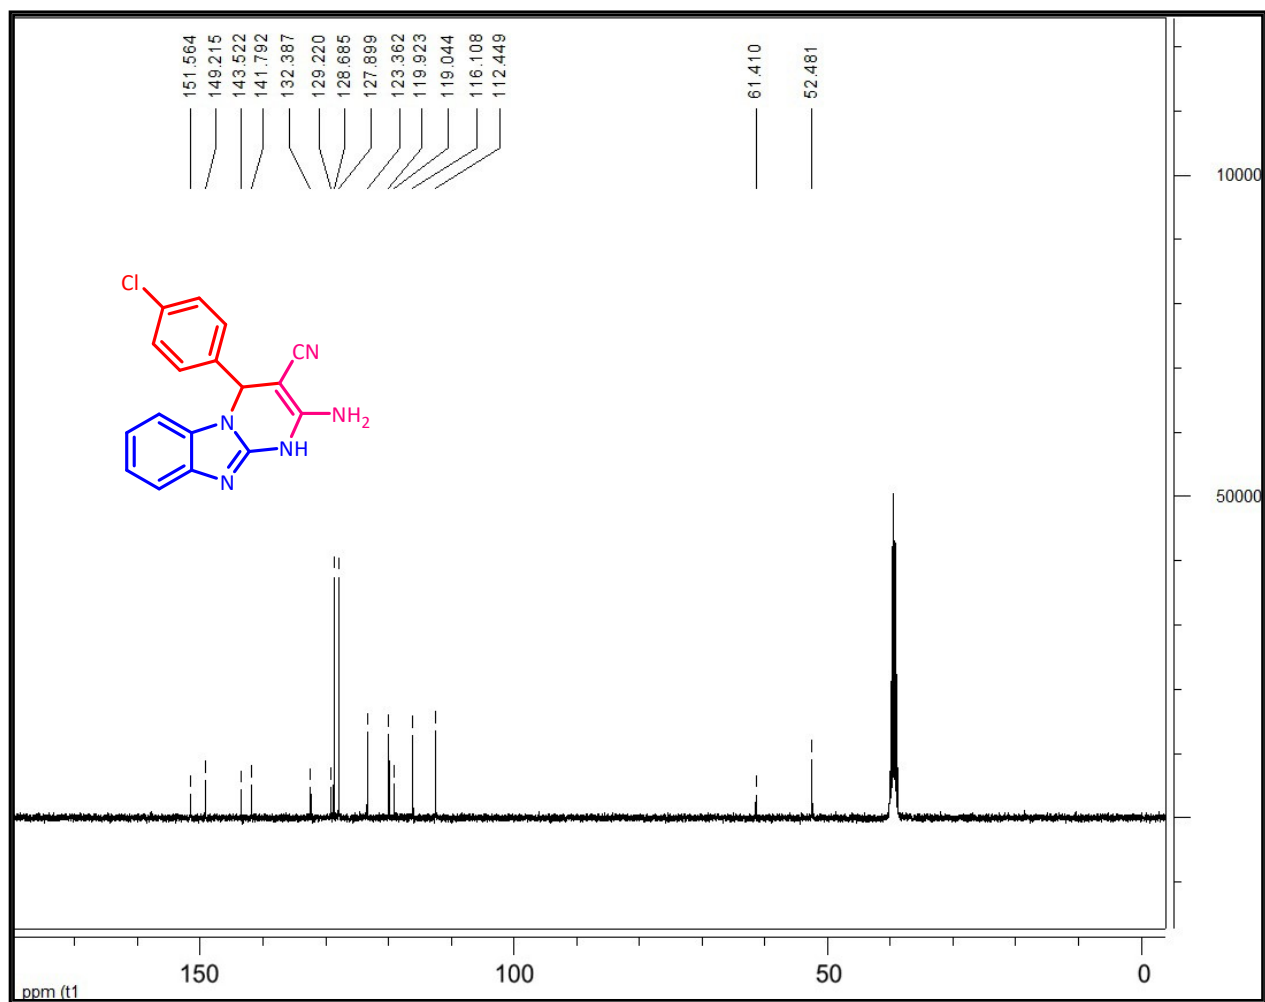

Figure 3: The  $^{13}\text{C}$  NMR spectrum of 2-amino-4-(4-chlorophenyl)-1,4-dihydrobenzo[4,5]imidazo[1,2-a]pyrimidine-3-carbonitrile.

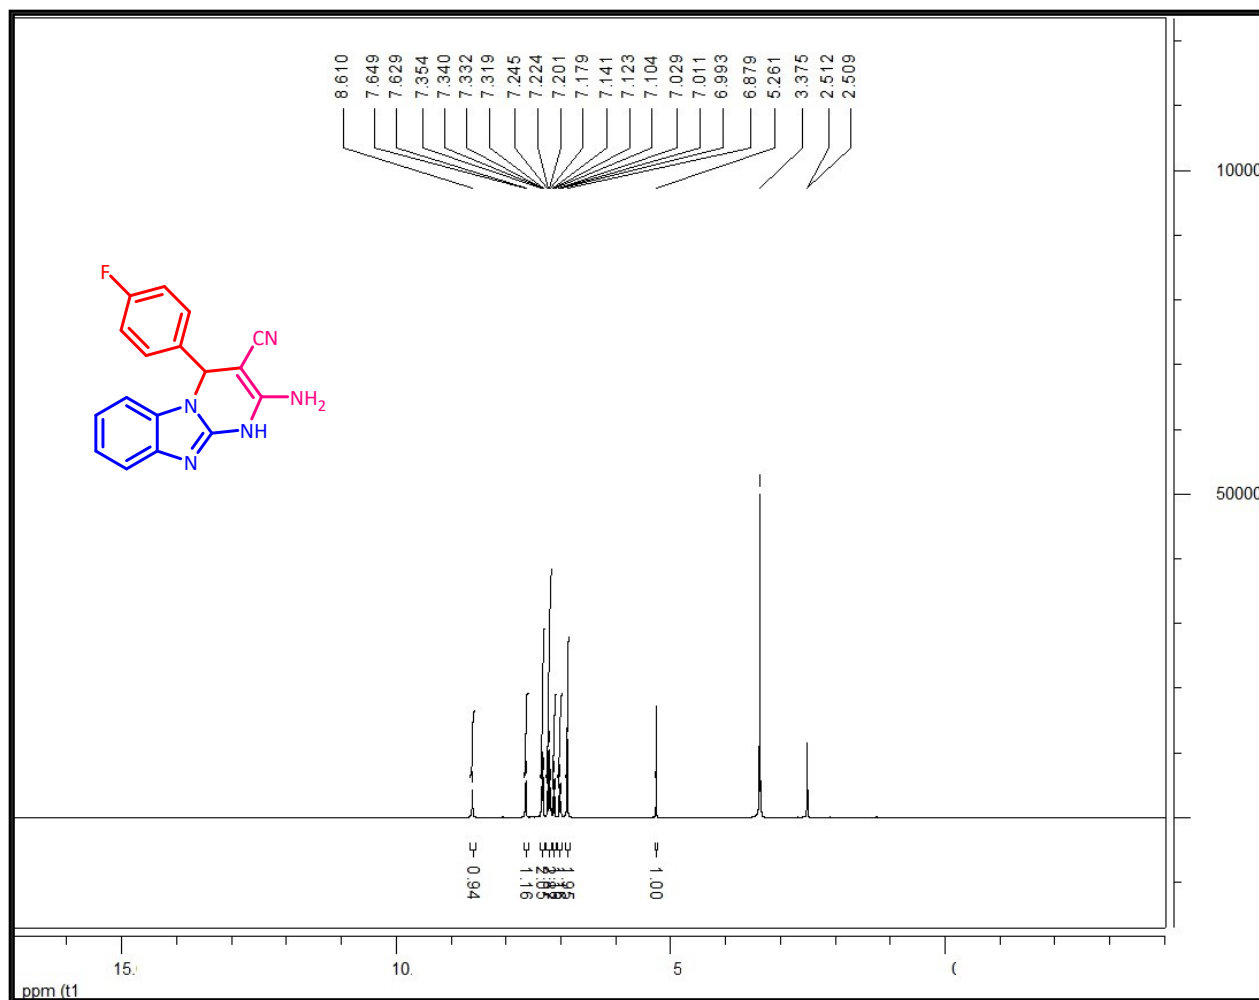

Figure 4: The  $^1\text{H}$  NMR spectrum of 2-amino-4-(4-fluorophenyl)-1,4-dihydrobenzo[4,5]imidazo[1,2-a]pyrimidine-3-carbonitrile.

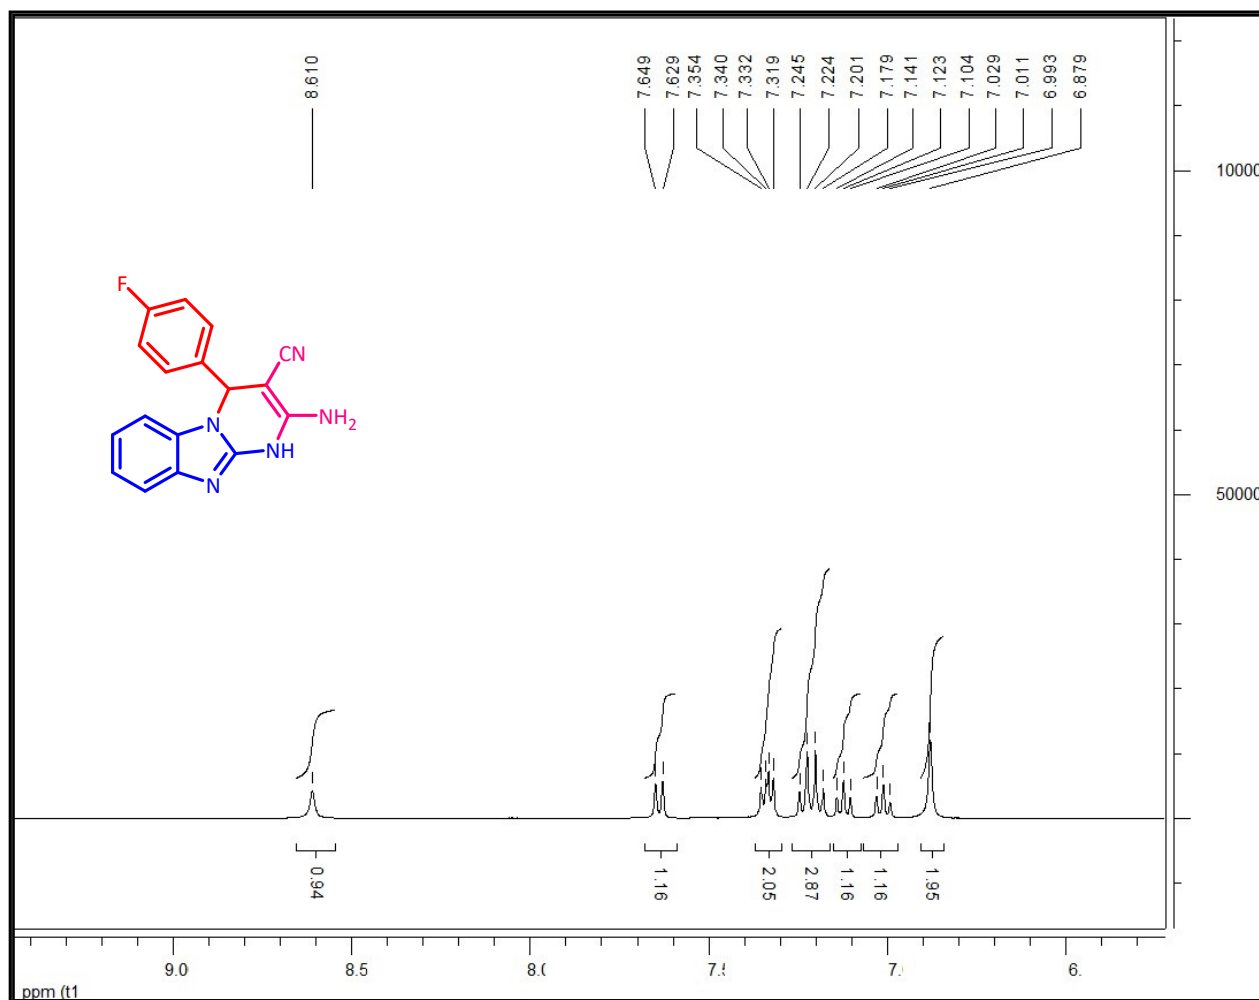

Figure 5: The <sup>1</sup>H NMR spectrum of 2-amino-4-(4-fluorophenyl)-1,4-dihydrobenzo[4,5]imidazo[1,2-a]pyrimidine-3-carbonitrile.

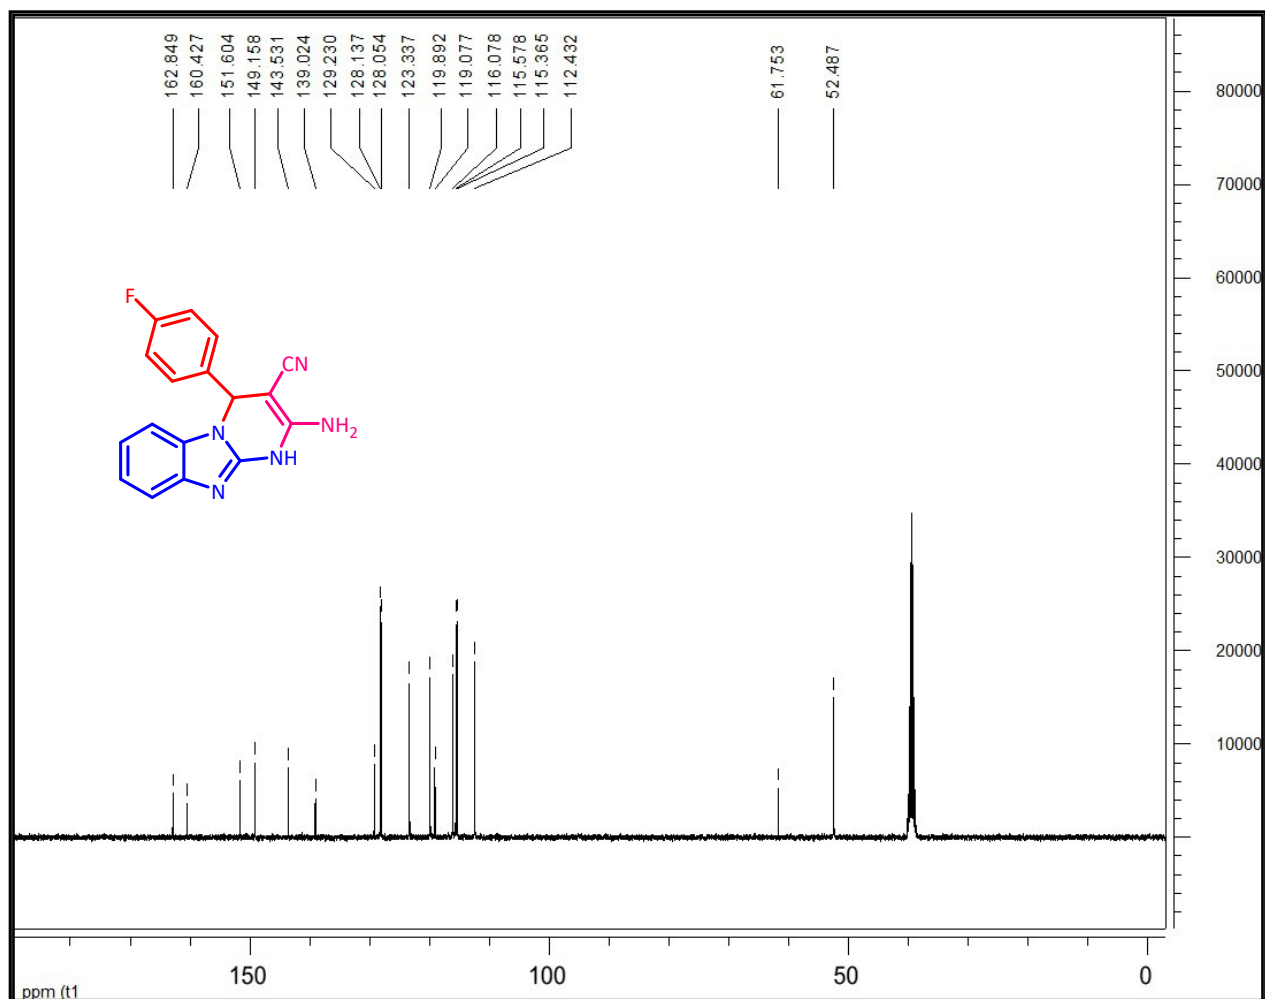

Figure 6: The <sup>13</sup>C NMR spectrum of 2-amino-4-(4-fluorophenyl)-1,4-dihydrobenzo[4,5]imidazo[1,2-a]pyrimidine-3-carbonitrile.

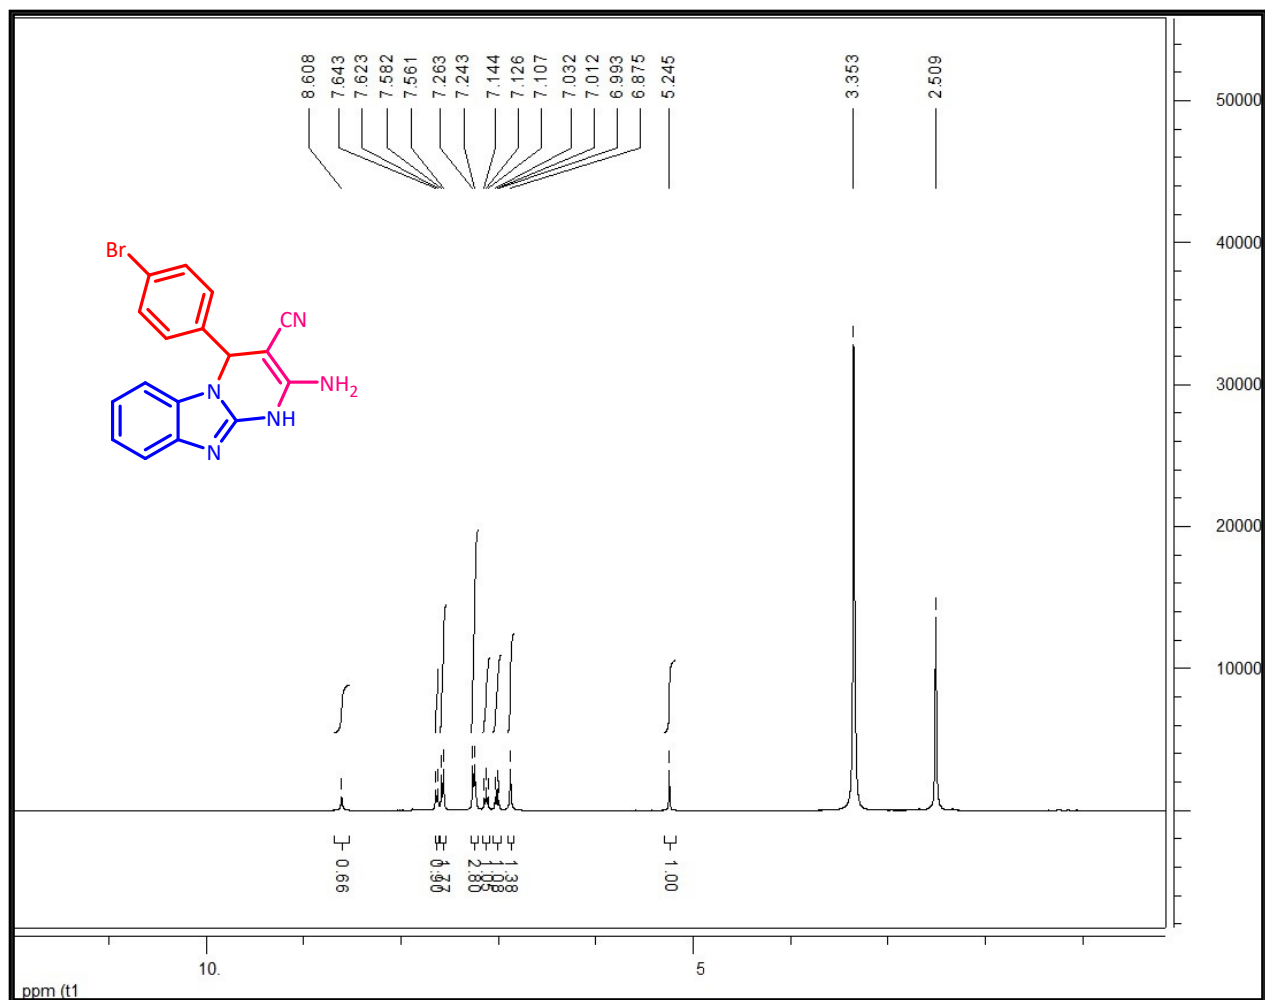

Figure 7: The  $^1\text{H}$  NMR spectrum of 2-amino-4-(4-bromophenyl)-1,4-dihydrobenzo[4,5]imidazo[1,2-a]pyrimidine-3-carbonitrile.

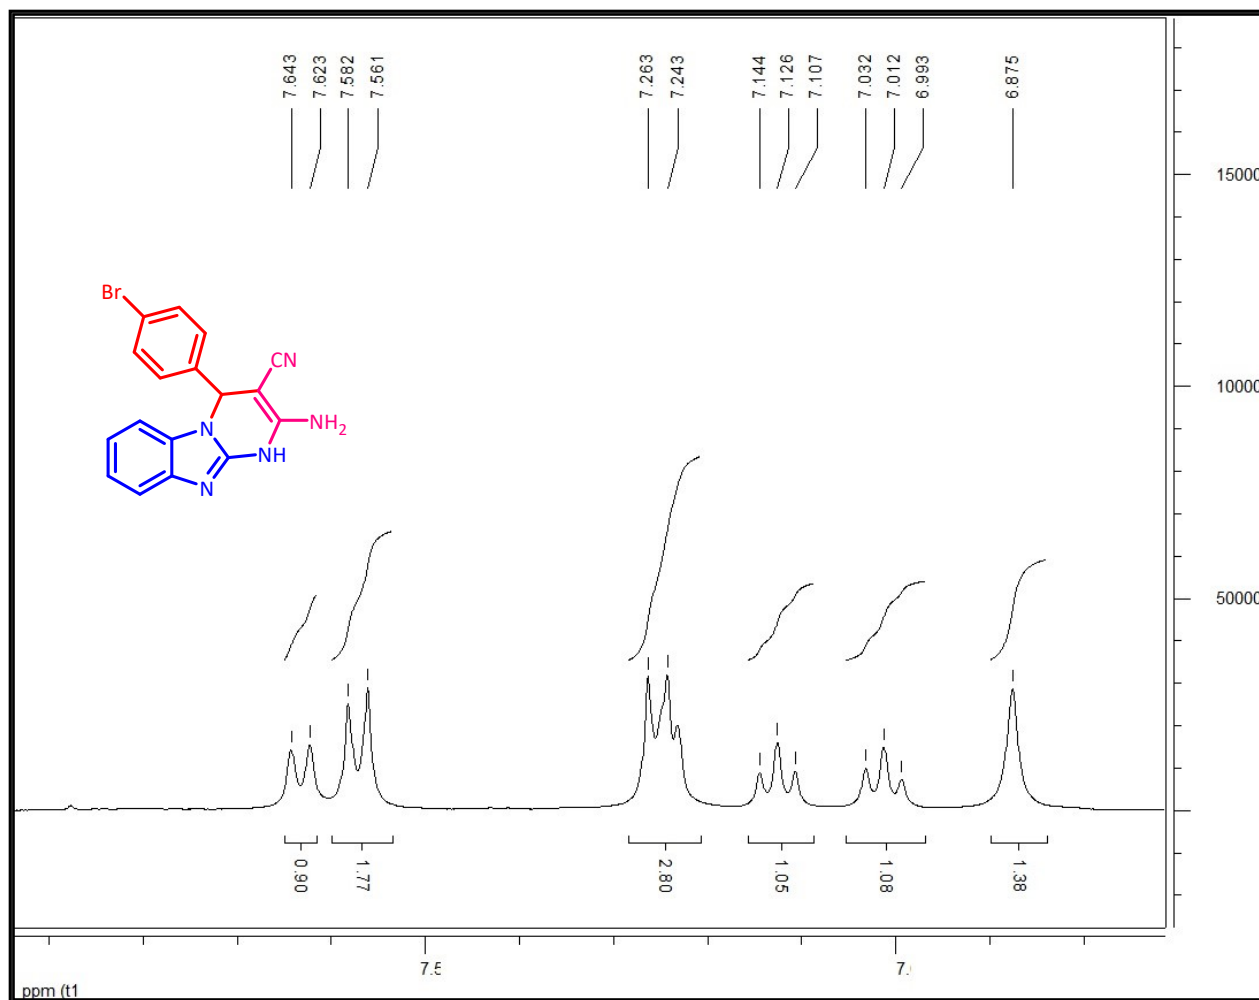

Figure 8: The <sup>1</sup>H NMR spectrum of 2-amino-4-(4-bromophenyl)-1,4-dihydrobenzo[4,5]imidazo[1,2-a]pyrimidine-3-carbonitrile.



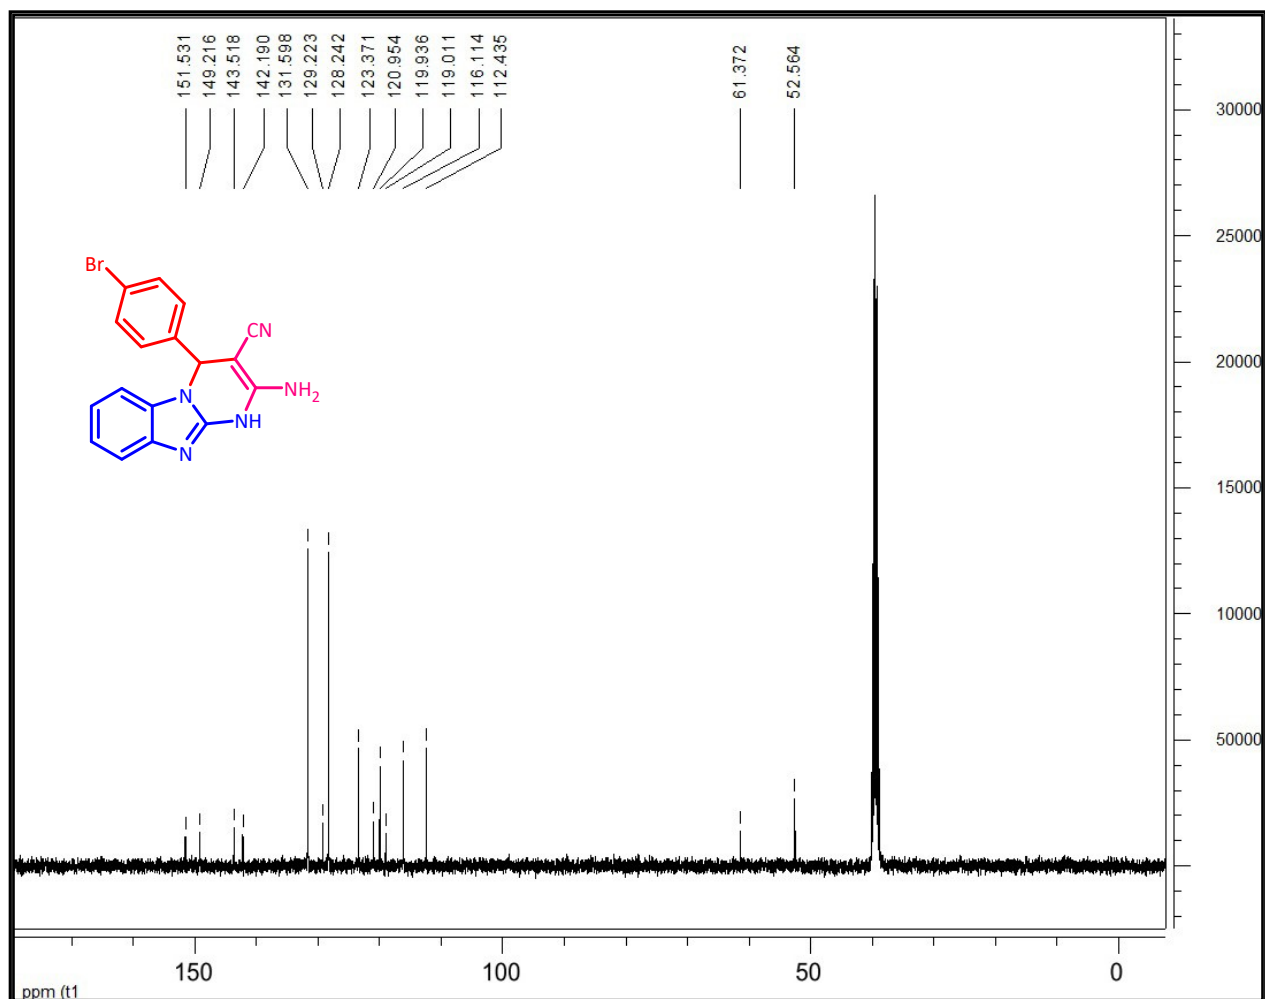

Figure 9: The  $^{13}\text{C}$  NMR spectrum of 2-amino-4-(4-bromophenyl)-1,4-dihydrobenzo[4,5]imidazo[1,2-a]pyrimidine-3-carbonitrile.

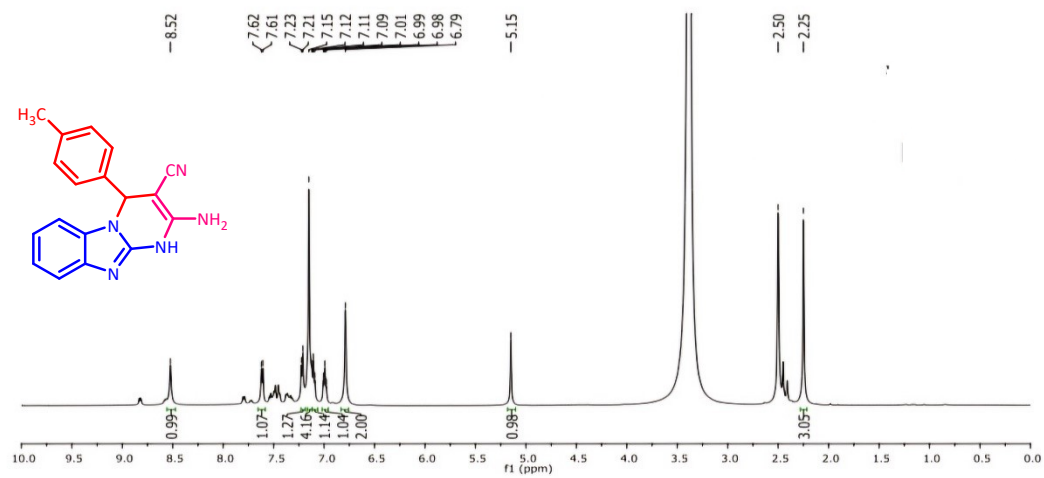

Figure 10: The <sup>1</sup>H NMR spectrum of 2-amino-4-(*p*-tolyl)-1,4-dihydrobenzo[4,5]imidazo[1,2-*a*]pyrimidine-3-carbonitrile.

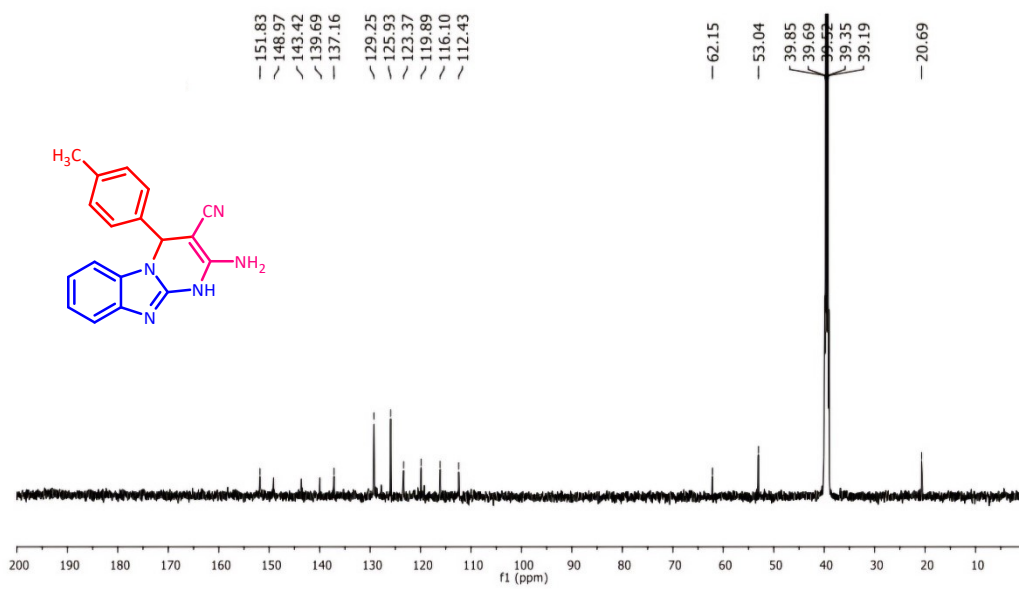

Figure 11: The  $^{13}\text{C}$  NMR spectrum of 2-amino-4-(*p*-tolyl)-1,4-dihydrobenzo[4,5]imidazo[1,2-*a*]pyrimidine-3-carbonitrile.

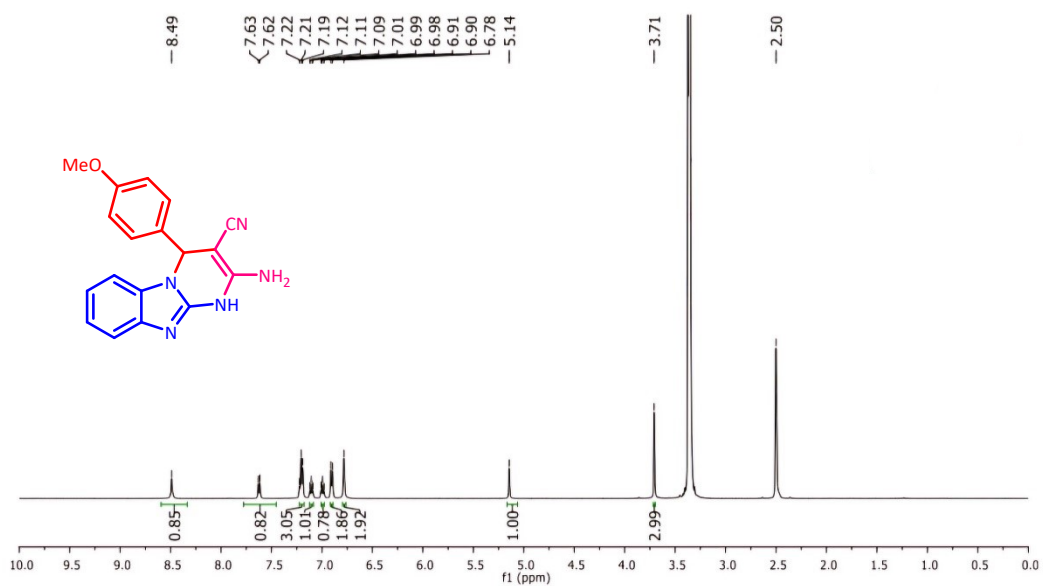

Figure 12: The  $^1\text{H}$  NMR spectrum of 2-amino-4-(4-methoxyphenyl)-1,4-dihydrobenzo[4,5]imidazo[1,2-a]pyrimidine-3-carbonitrile.

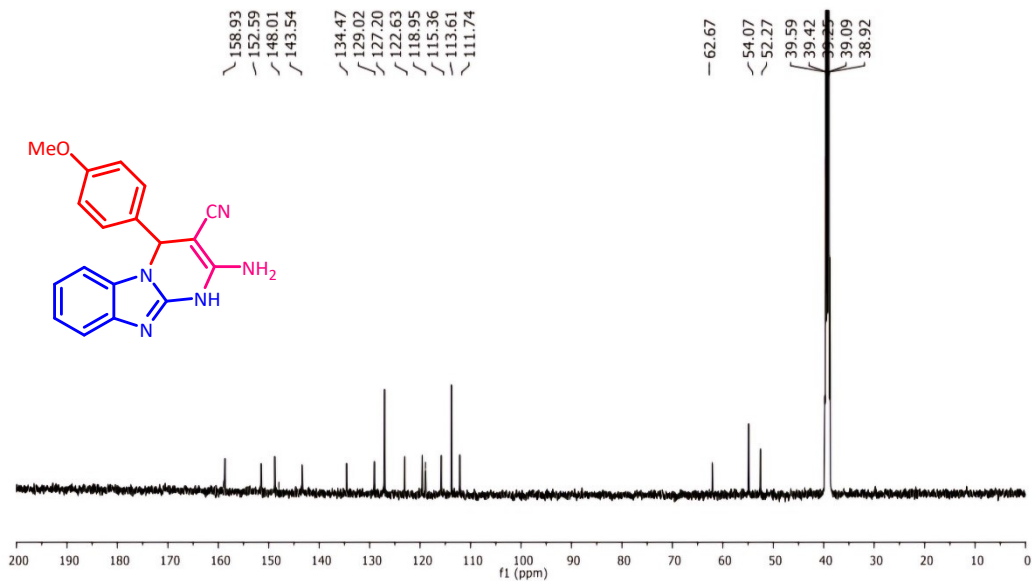

Figure 13: The <sup>13</sup>C NMR spectrum of 2-amino-4-(4-methoxyphenyl)-1,4-dihydrobenzo[4,5]imidazo[1,2-a]pyrimidine-3-carbonitrile.

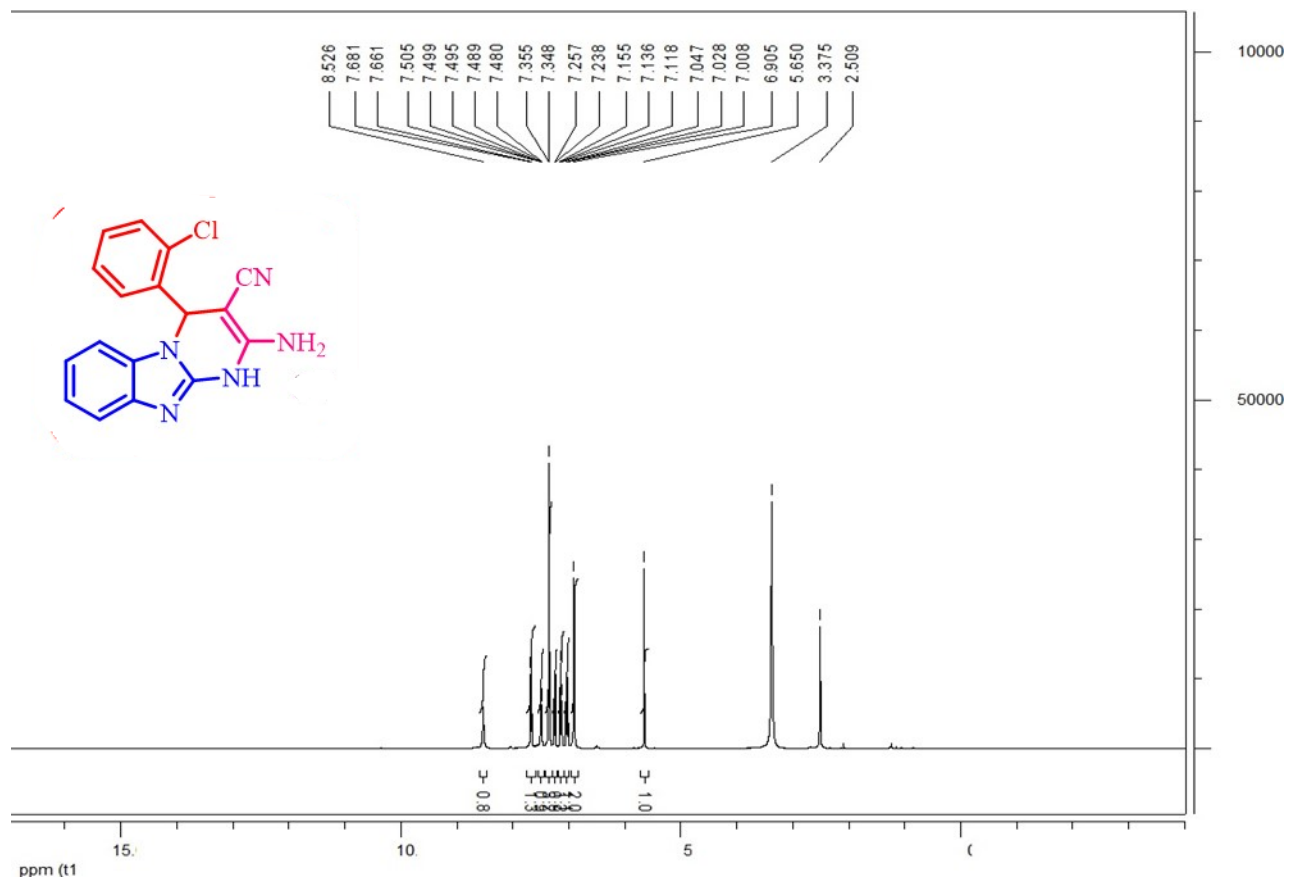

Figure 14: The <sup>1</sup>H NMR spectrum of 2-amino-4-(2-chlorophenyl)-1,4-dihydrobenzo[4,5]imidazo[1,2-a]pyrimidine-3-carbonitrile.

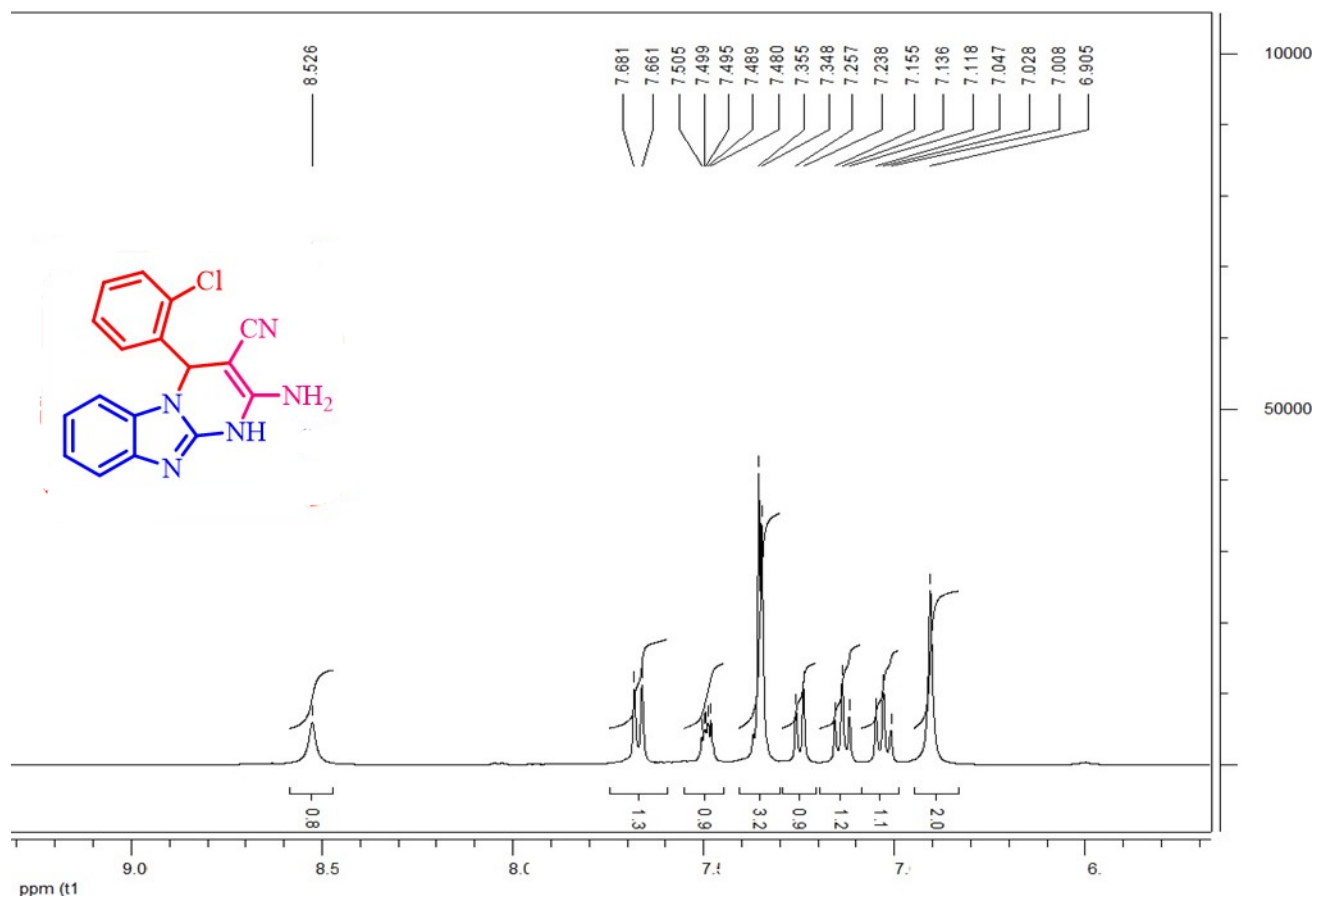

Figure 15: The <sup>1</sup>H NMR spectrum of 2-amino-4-(2-chlorophenyl)-1,4-dihydrobenzo[4,5]imidazo[1,2-a]pyrimidine-3-carbonitrile.

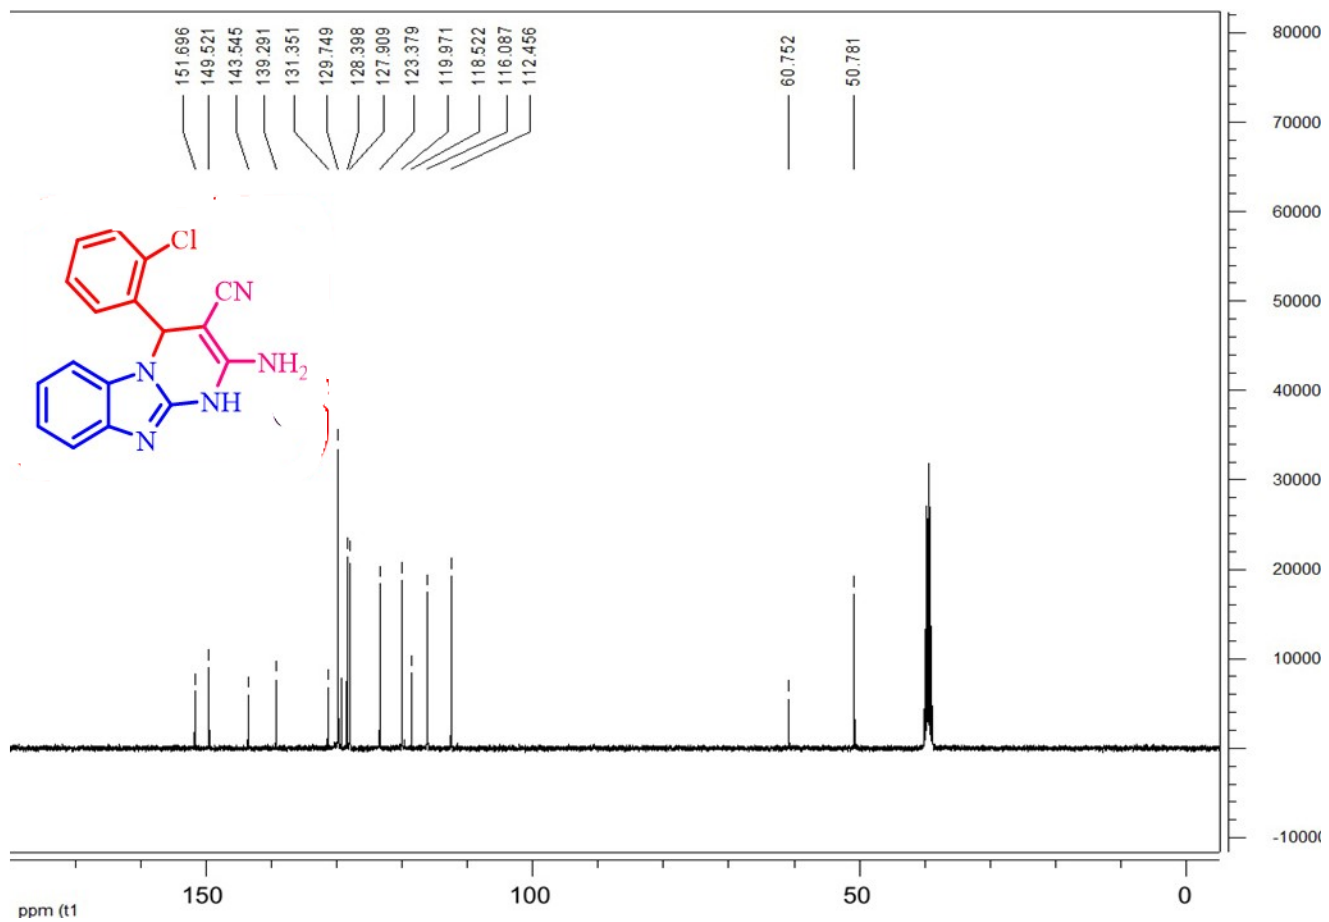

Figure 16: The <sup>13</sup>C NMR spectrum of 2-amino-4-(2-chlorophenyl)-1,4-dihydrobenzo[4,5]imidazo[1,2-a]pyrimidine-3-carbonitrile.



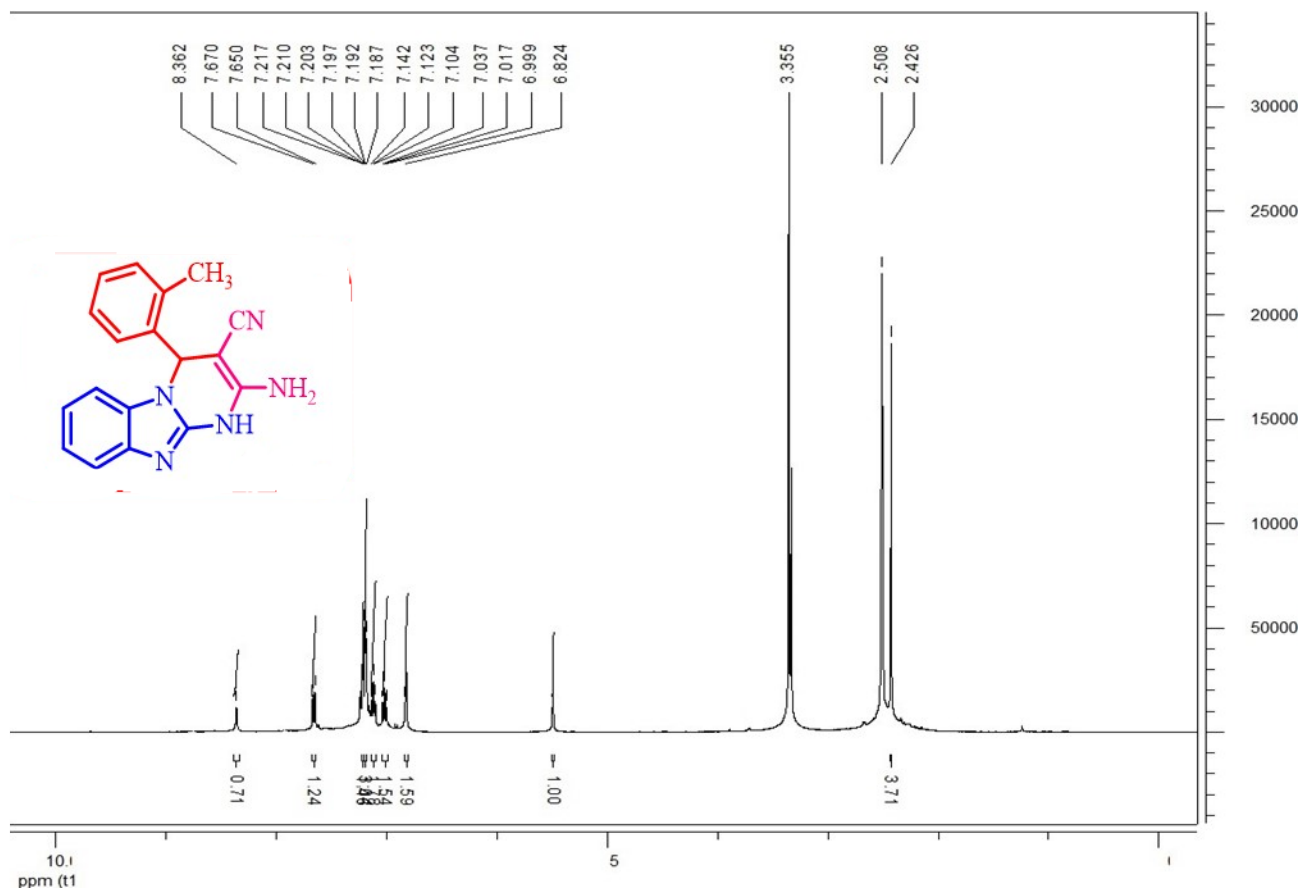

Figure 17: The <sup>1</sup>H NMR spectrum of 2-amino-4-(o-tolyl)-1,4-dihydrobenzo[4,5]imidazo[1,2-a]pyrimidine-3-carbonitrile.

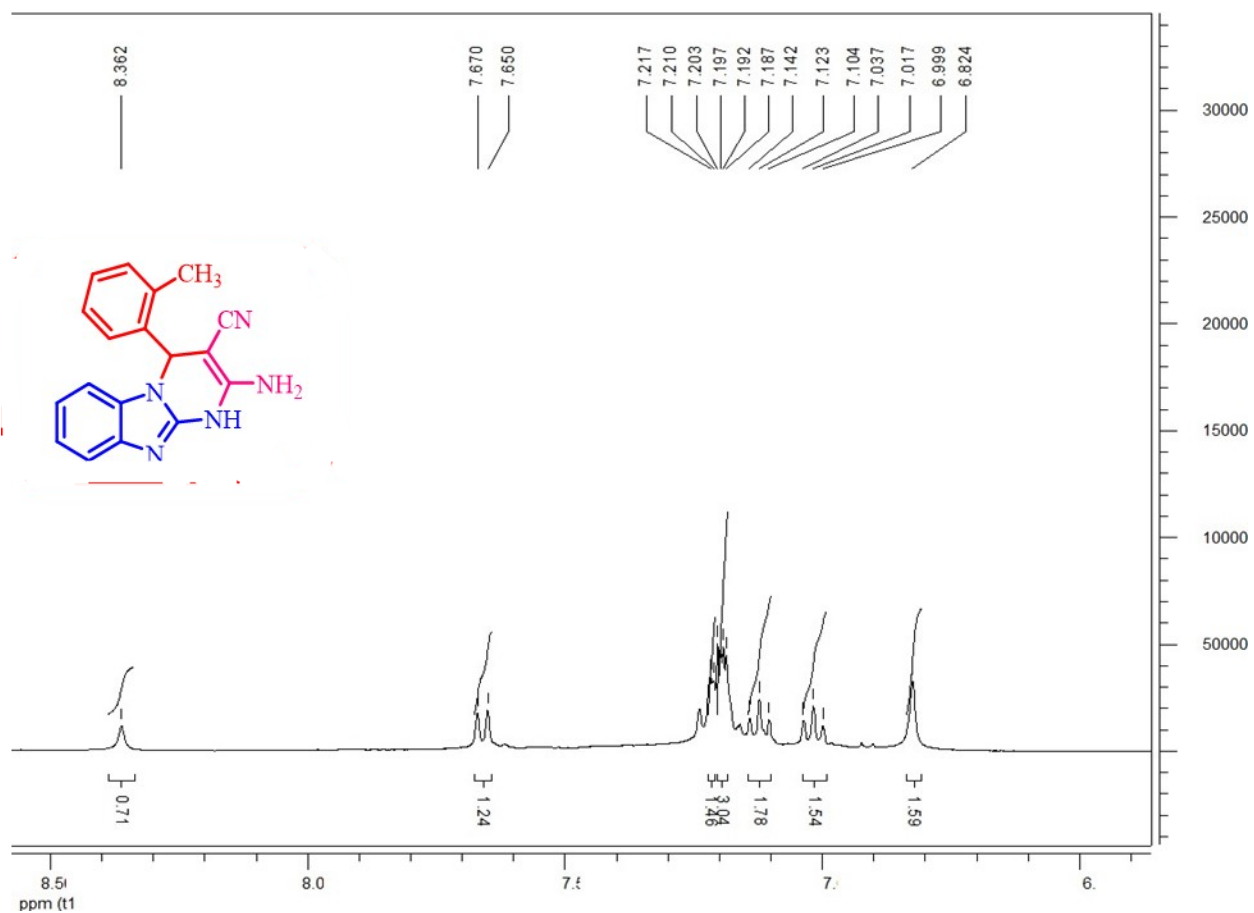

Figure 18: The  $^1\text{H}$  NMR spectrum of 2-amino-4-(o-tolyl)-1,4-dihydrobenzo[4,5]imidazo[1,2-a]pyrimidine-3-carbonitrile.

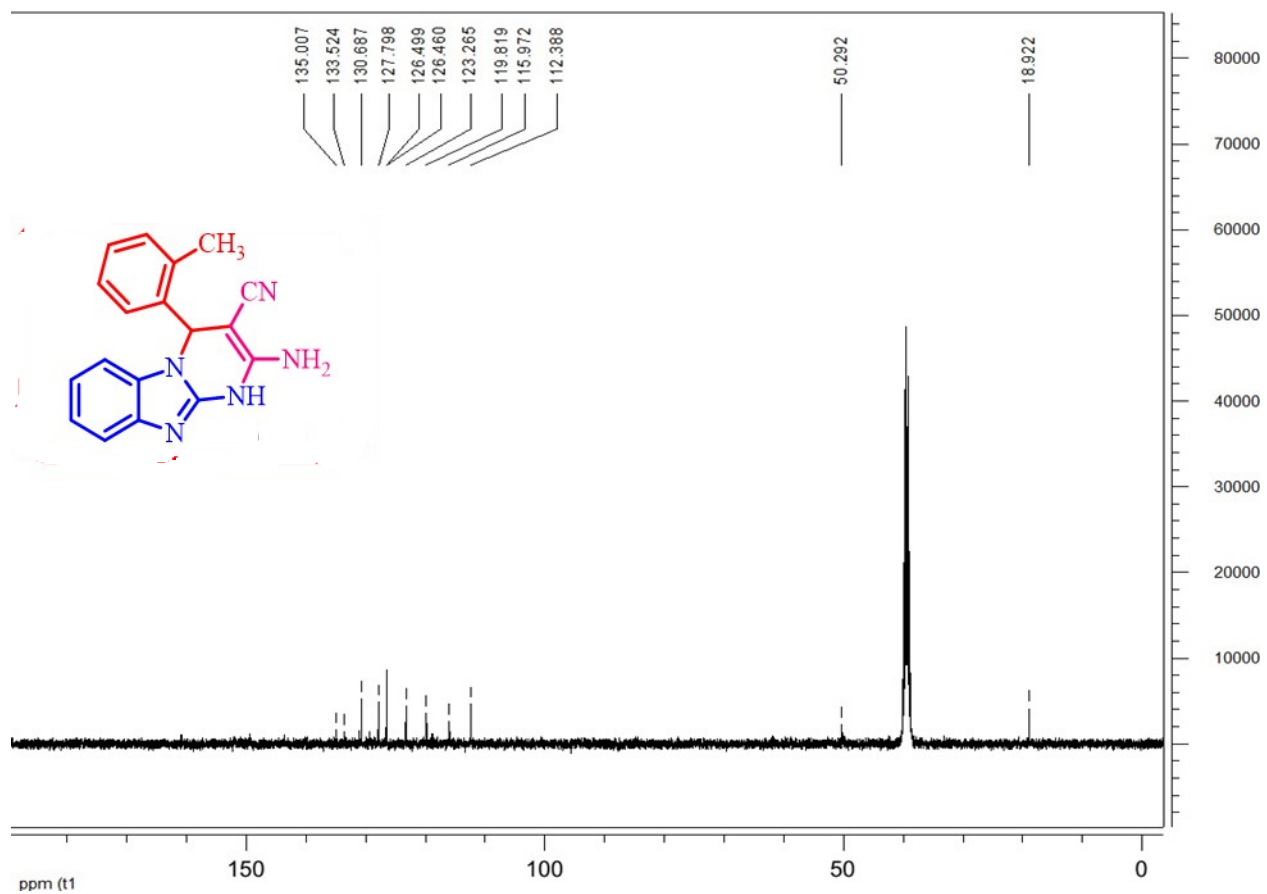

Figure 19: The  $^{13}\text{C}$  NMR spectrum of 2-amino-4-(o-tolyl)-1,4-dihydrobenzo[4,5]imidazo[1,2-a]pyrimidine-3-carbonitrile.

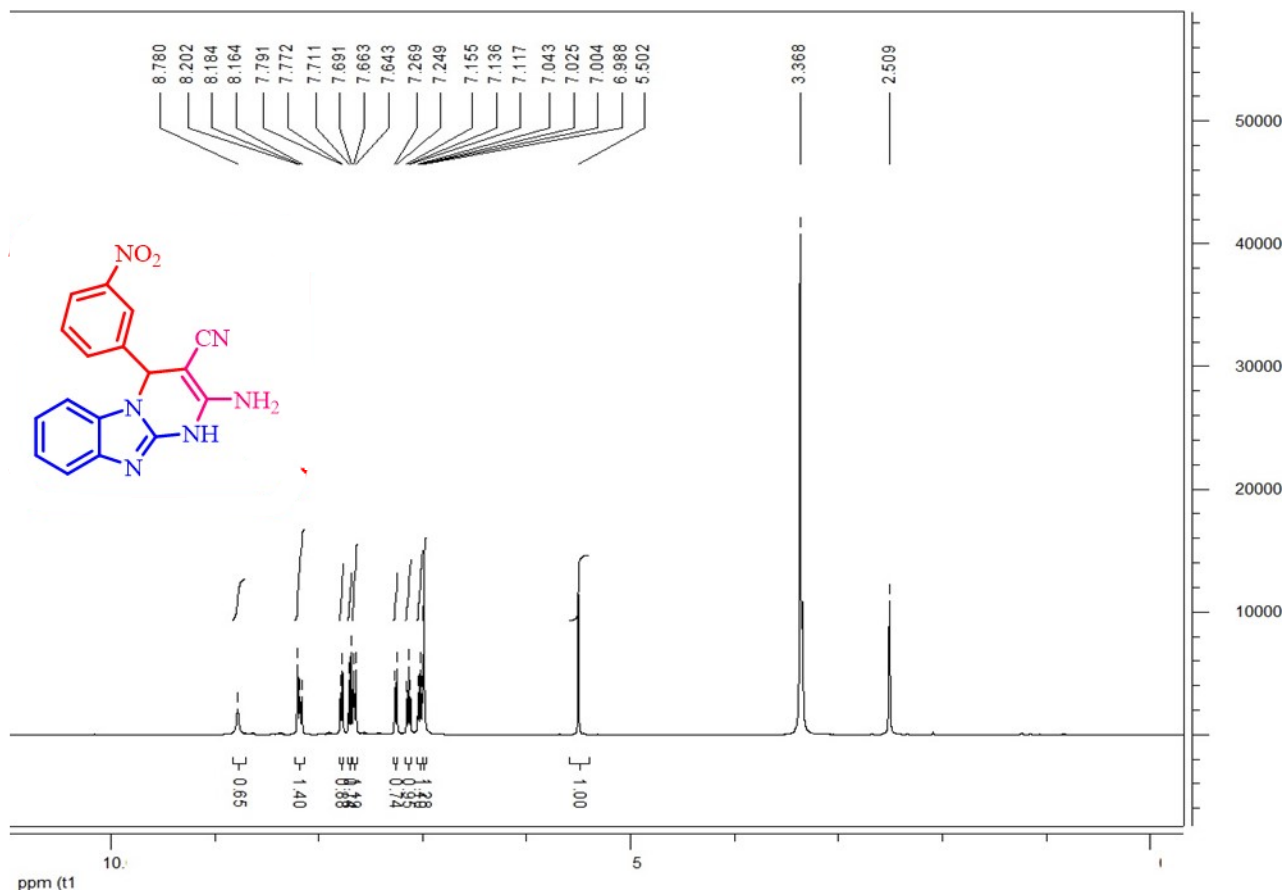

Figure 20: The <sup>1</sup>H NMR spectrum of 2-amino-4-(3-nitrophenyl)-1,4-dihydrobenzo[4,5]imidazo[1,2-a]pyrimidine-3-carbonitrile.

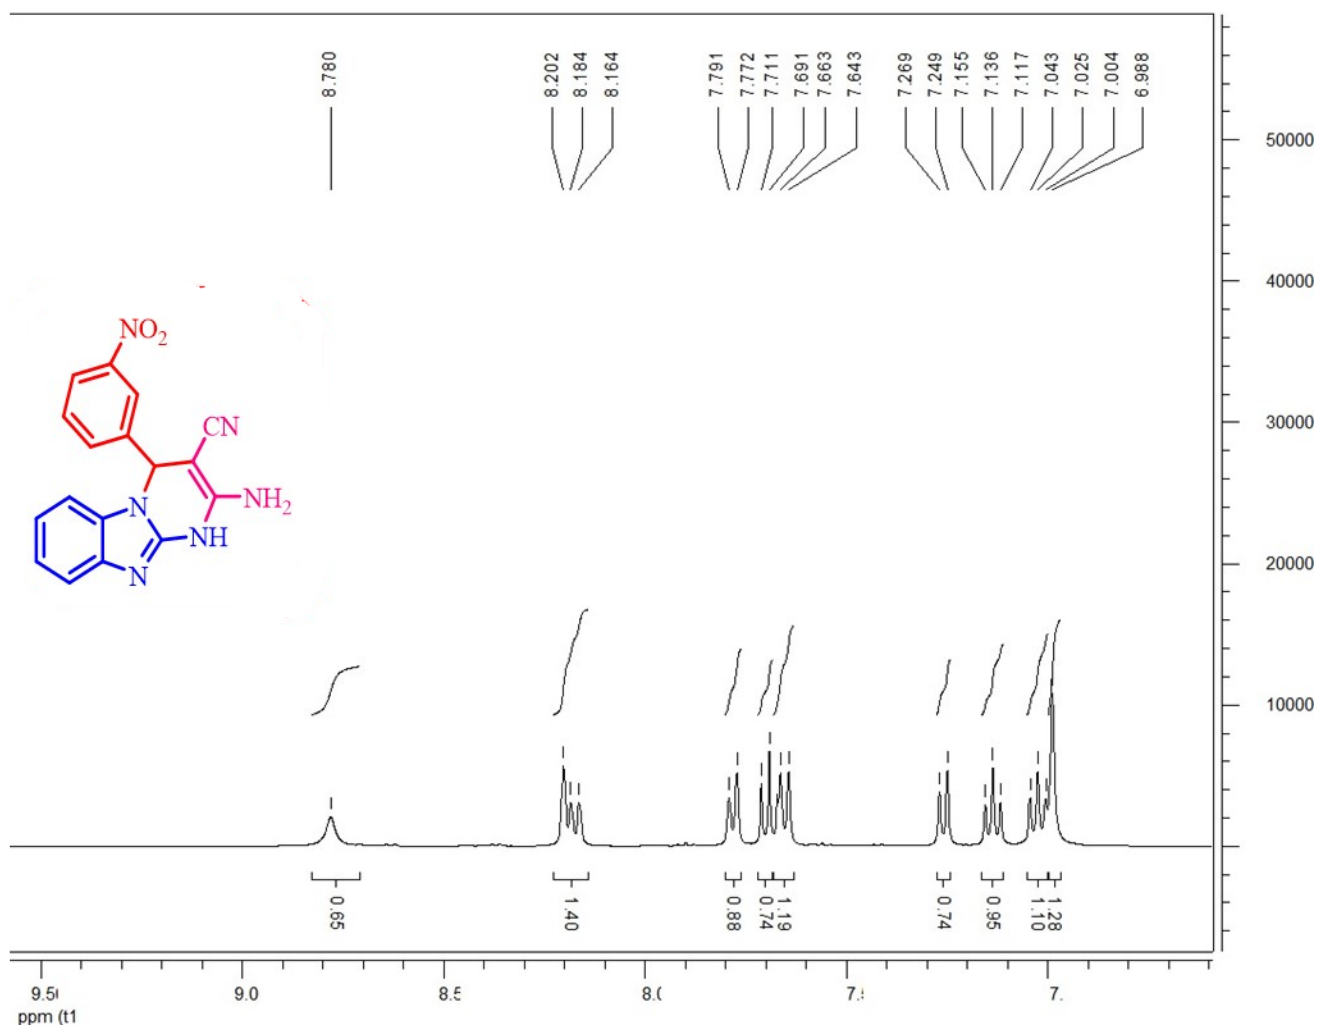

Figure 21: The <sup>1</sup>H NMR spectrum of 2-amino-4-(3-nitrophenyl)-1,4-dihydrobenzo[4,5]imidazo[1,2-a]pyrimidine-3-carbonitrile.

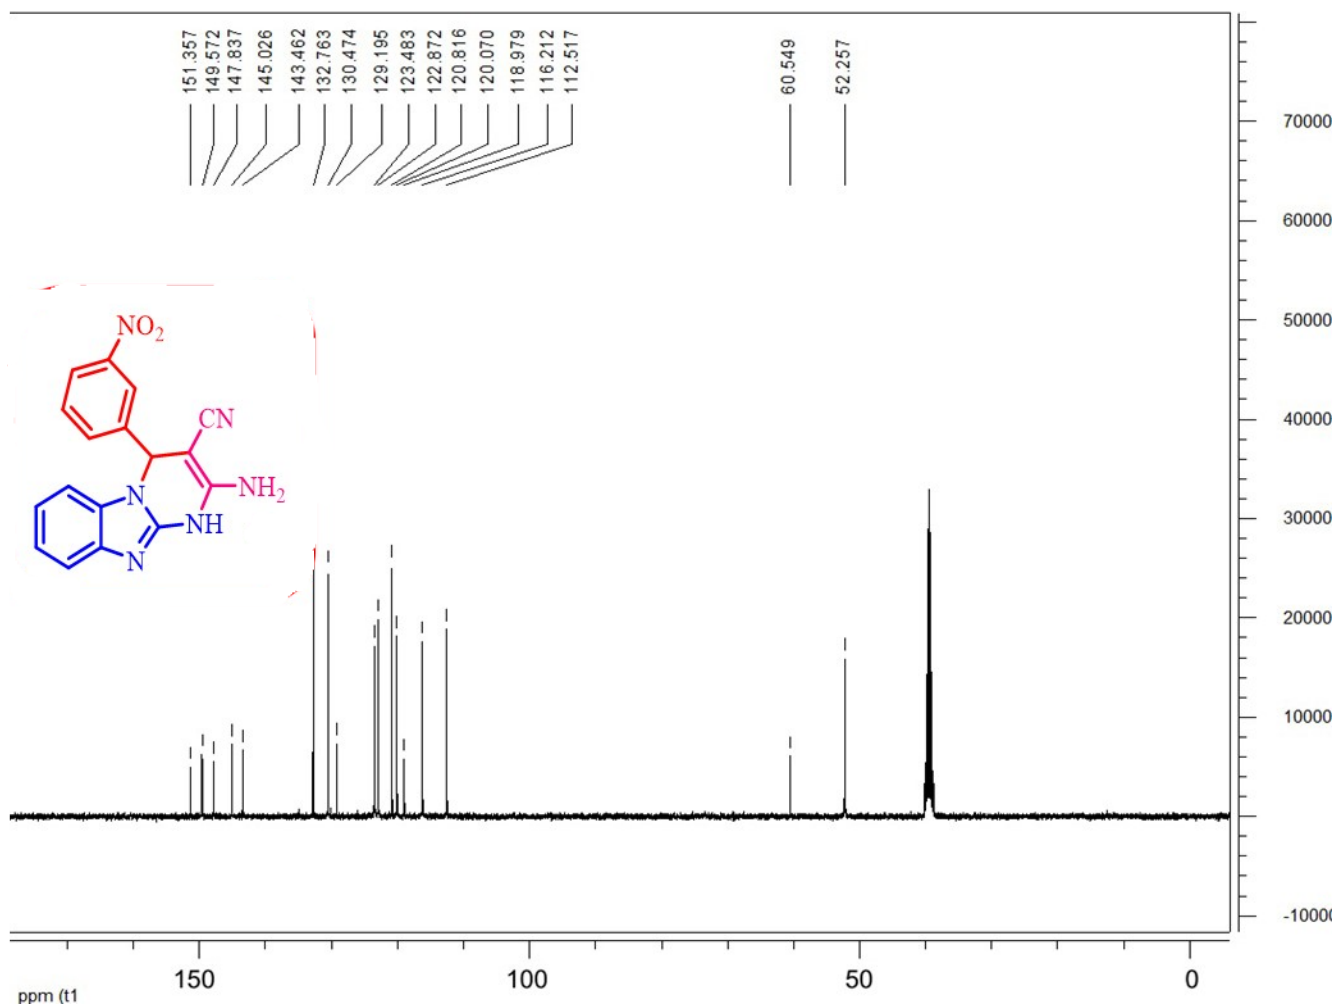

Figure 22: The  $^{13}\text{C}$  NMR spectrum of 2-amino-4-(3-nitrophenyl)-1,4-dihydrobenzo[4,5]imidazo[1,2-a]pyrimidine-3-carbonitrile.

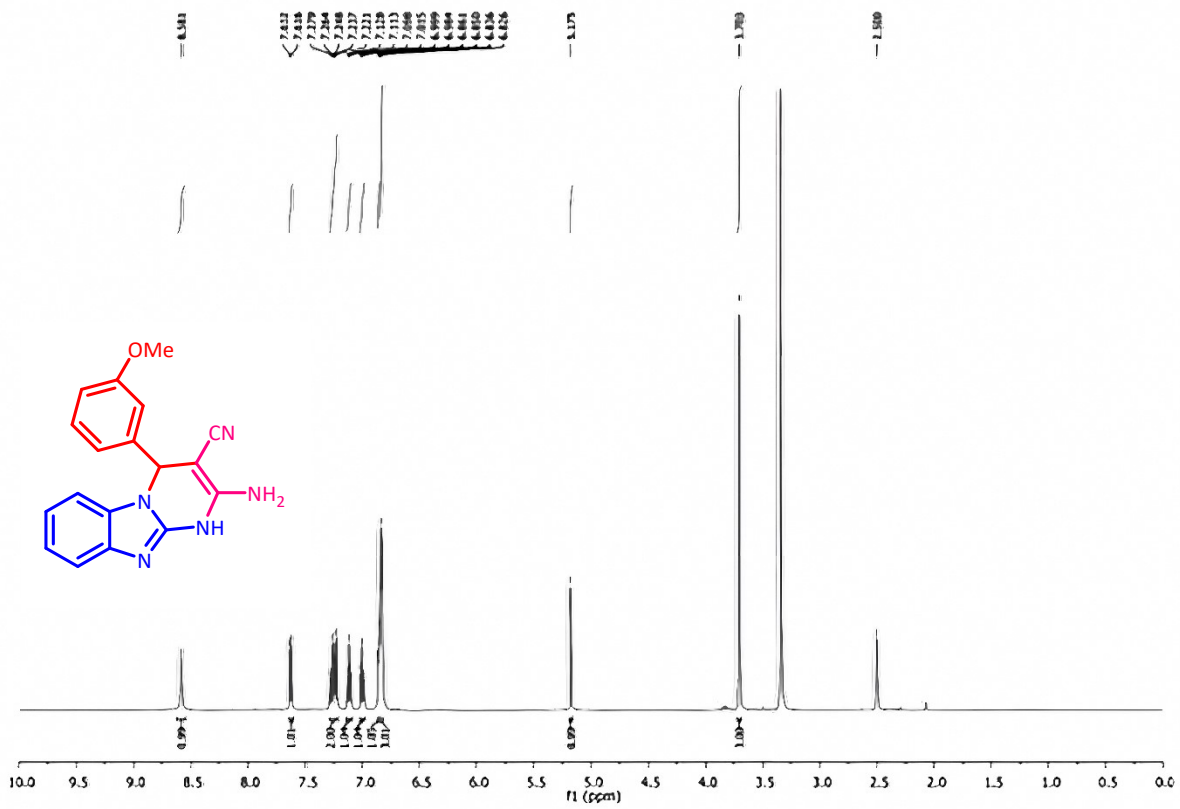

Figure 23: The <sup>1</sup>H NMR spectrum of 2-amino-4-(3-methoxyphenyl)-1,4-dihydrobenzo[4,5]imidazo[1,2-a]pyrimidine-3-carbonitrile.

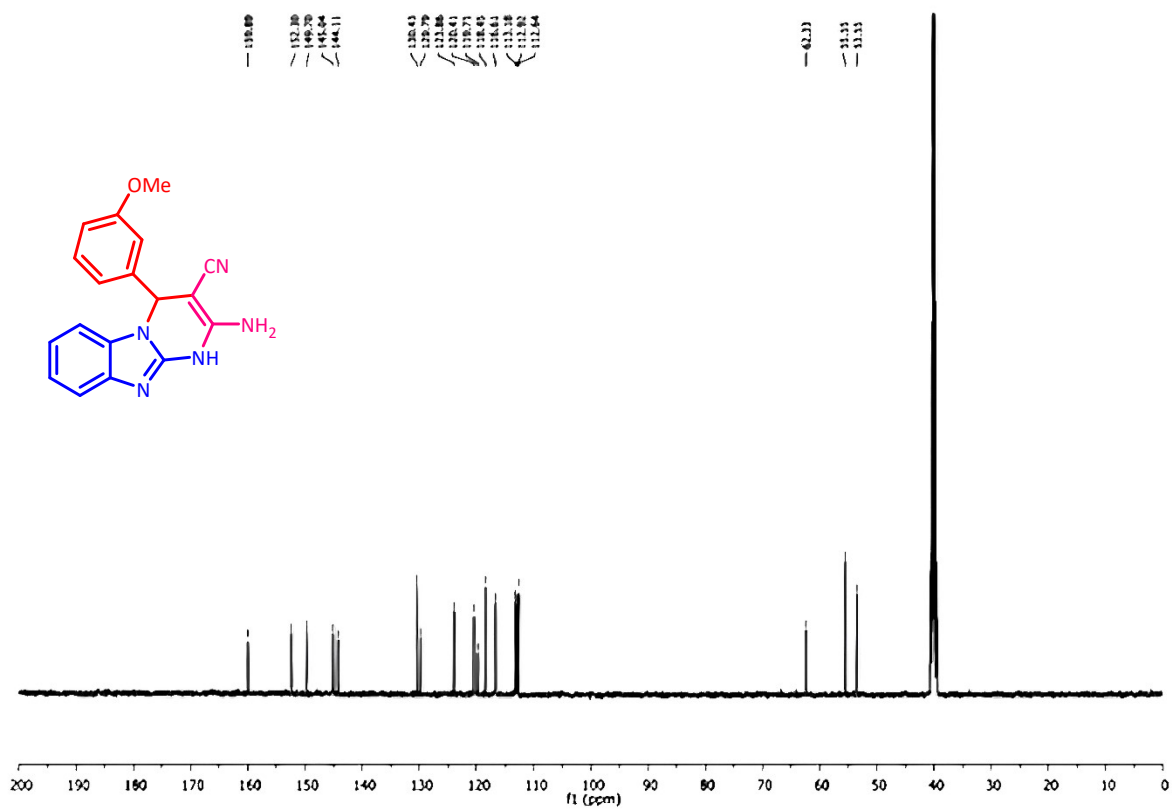

Figure 24: The  $^1\text{H}$  NMR spectrum of 2-amino-4-(3-methoxyphenyl)-1,4-dihydrobenzo[4,5]imidazo[1,2-*a*]pyrimidine-3-carbonitrile.



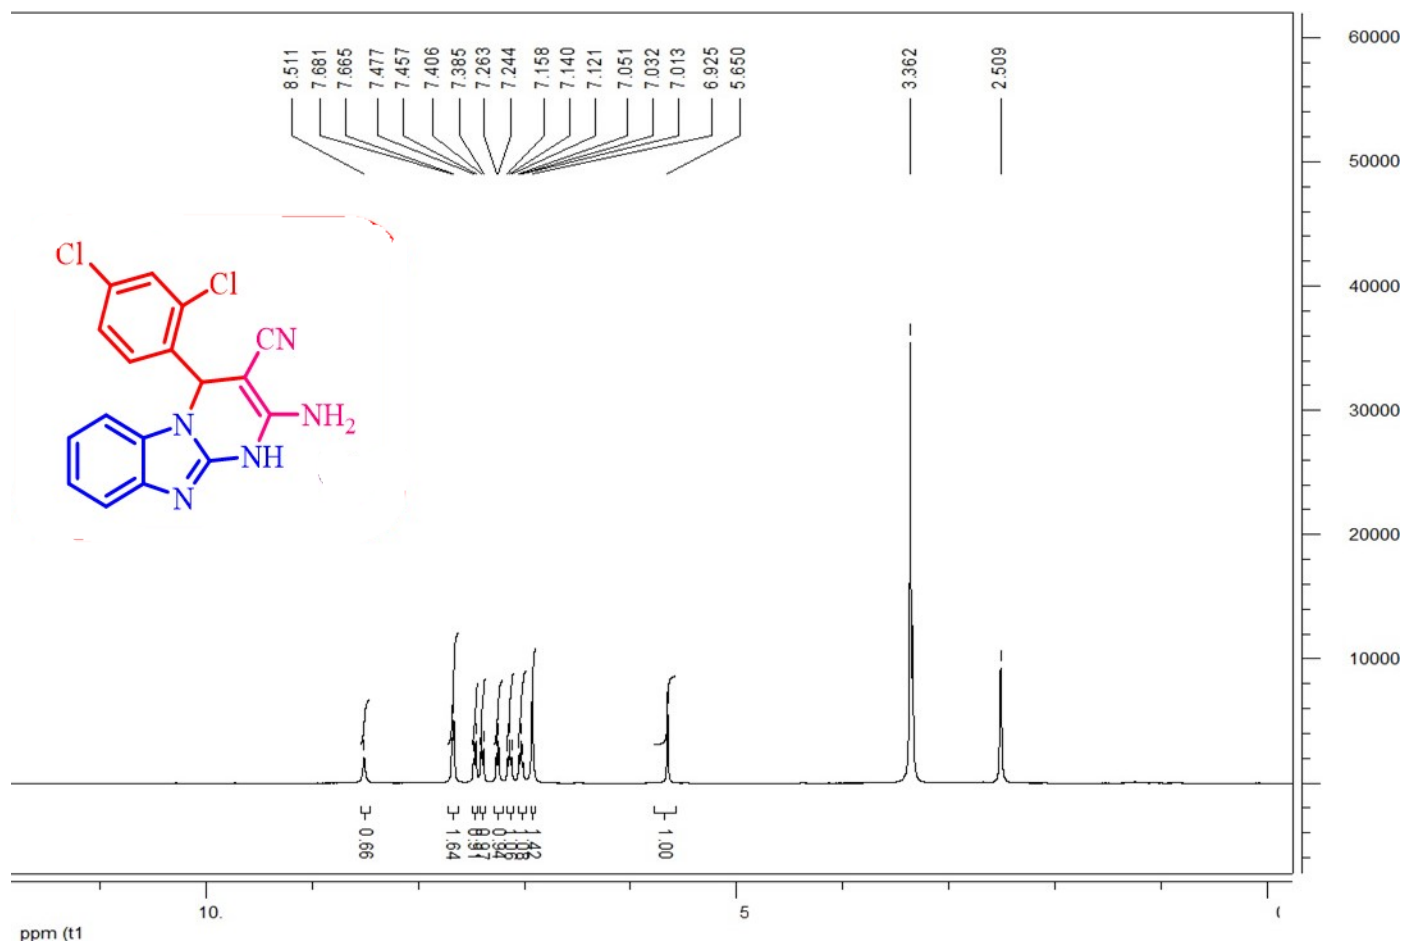

Figure 25: The  $^1\text{H}$  NMR spectrum of 2-amino-4-(2,4-dichlorophenyl)-1,4-dihydrobenzo[4,5]imidazo[1,2-a]pyrimidine-3-carbonitrile.

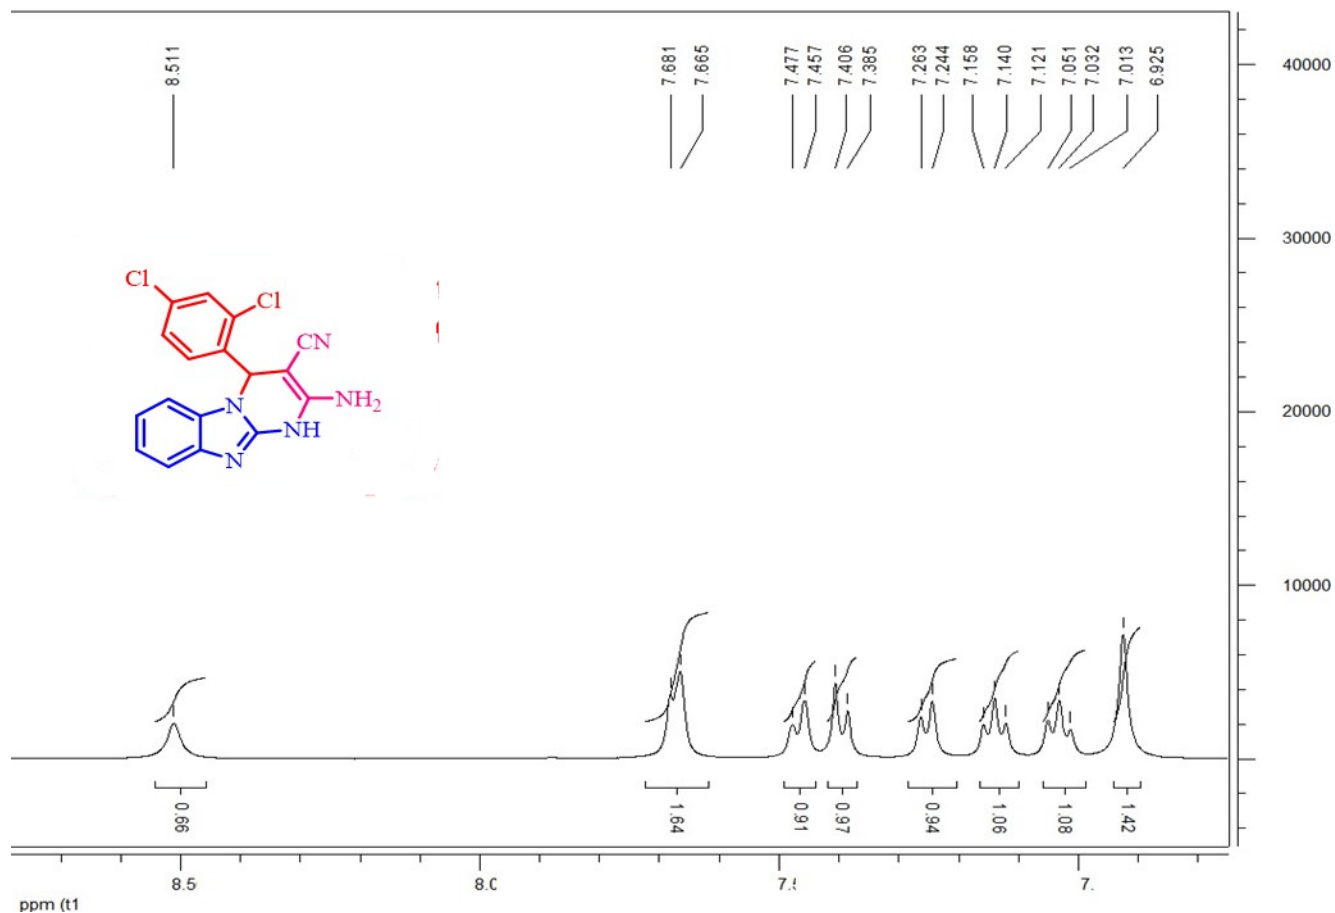

Figure 26: The <sup>1</sup>H NMR spectrum of 2-amino-4-(2,4-dichlorophenyl)-1,4-dihydrobenzo[4,5]imidazo[1,2-a]pyrimidine-3-carbonitrile.

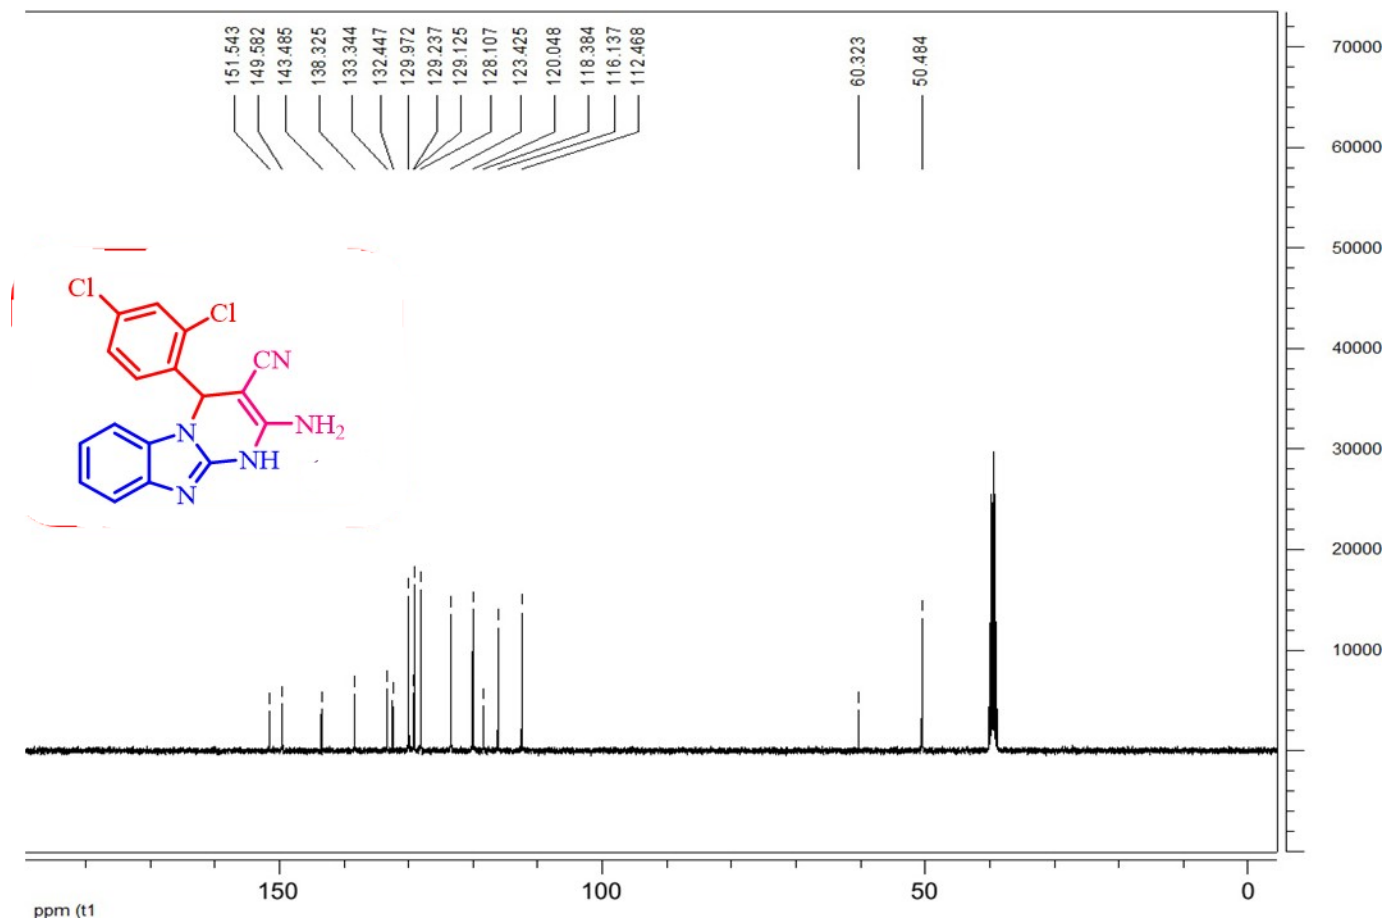

Figure 27: The  $^{13}\text{C}$  NMR spectrum of 2-amino-4-(2,4-dichlorophenyl)-1,4-dihydrobenzo[4,5]imidazo[1,2-a]pyrimidine-3-carbonitrile

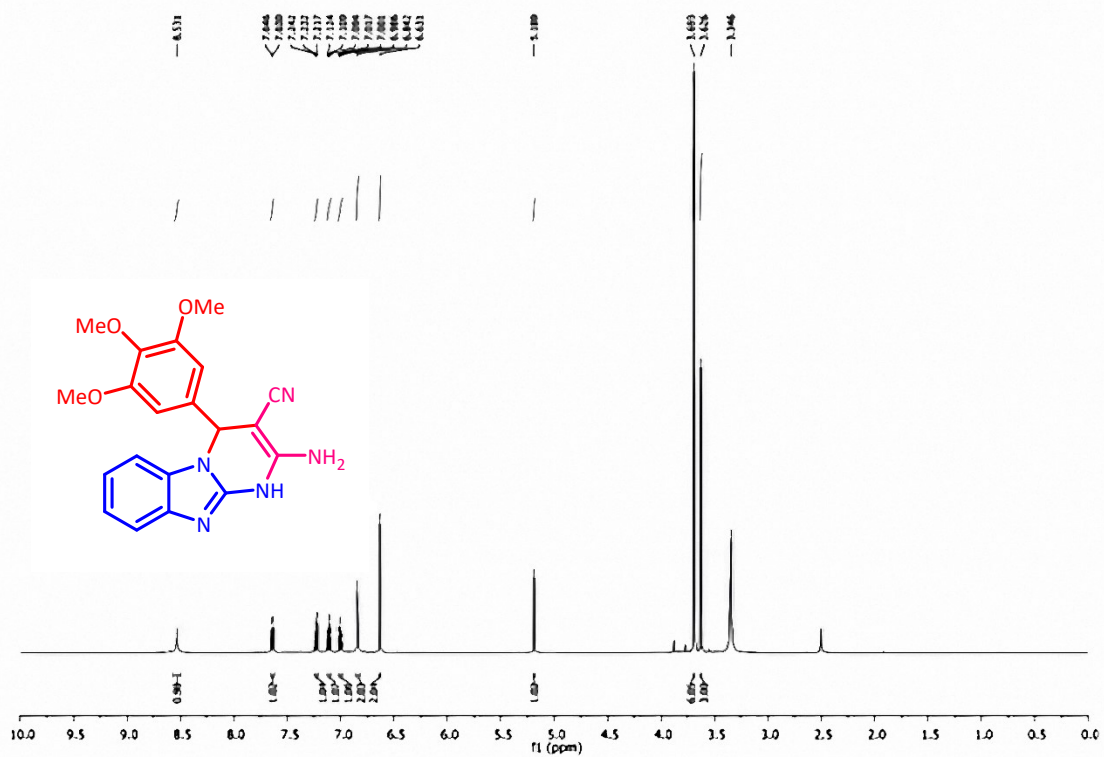

Figure 28: The  $^1\text{H}$  NMR spectrum of 2-amino-4-(3,4,5-trimethoxyphenyl)-1,4-dihydrobenzo[4,5]imidazo[1,2-a]pyrimidine-3-carbonitrile.

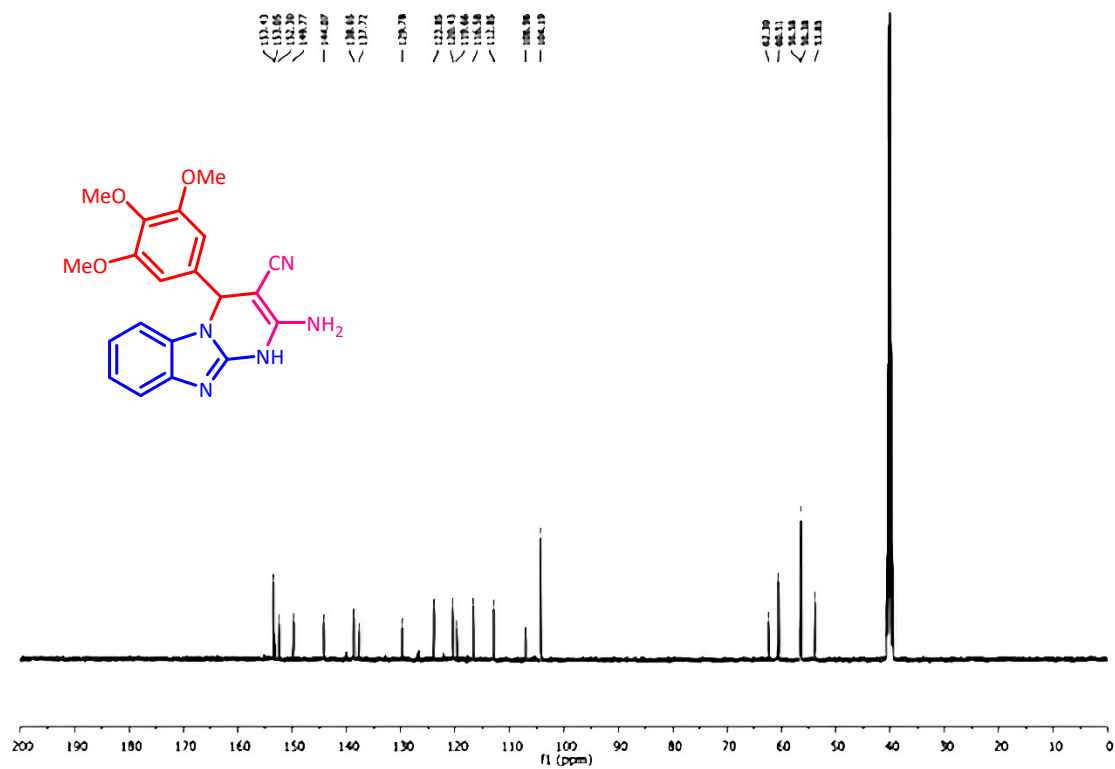

Figure 29: The <sup>13</sup>C NMR spectrum of 2-amino-4-(3,4,5-trimethoxyphenyl)-1,4-dihydrobenzo[4,5]imidazo[1,2-a]pyrimidine-3-carbonitrile.

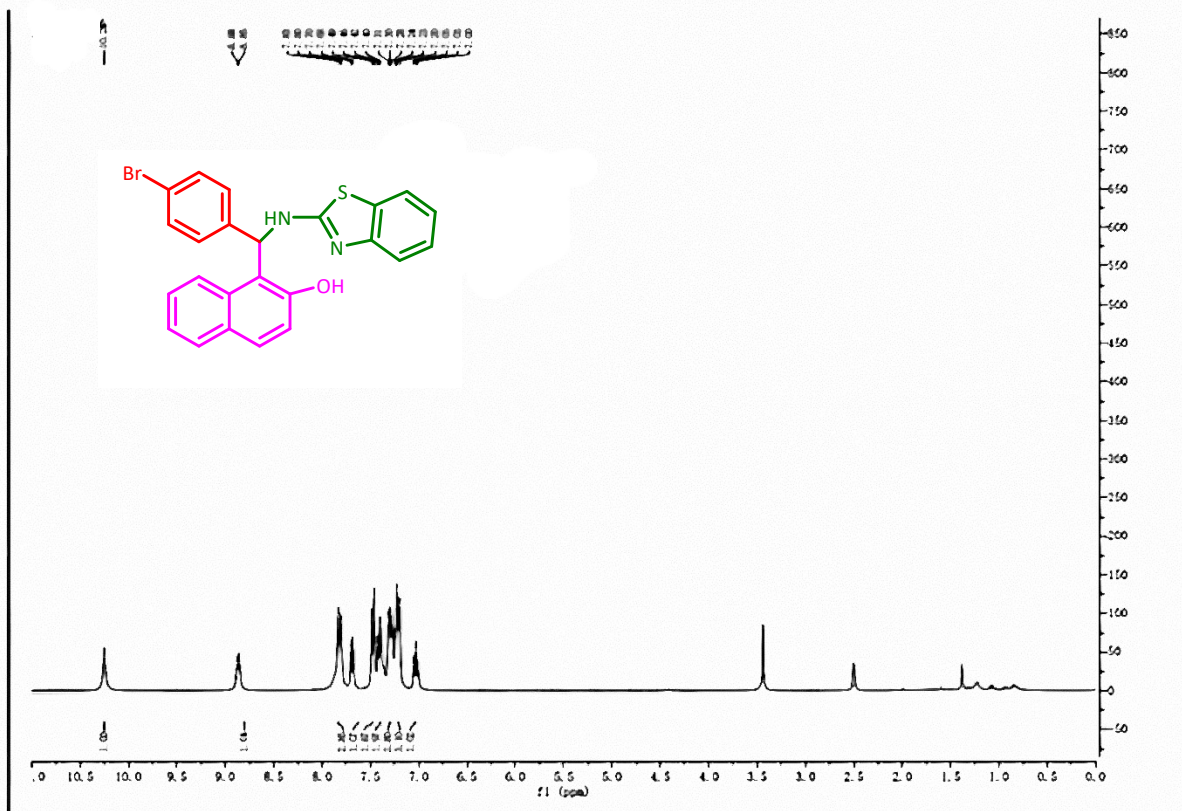

Figure 30: The <sup>1</sup>H NMR spectrum of 1-((benzo[d]thiazol-2-ylamino)(4-bromophenyl)methyl) naphthalen-2-ol.

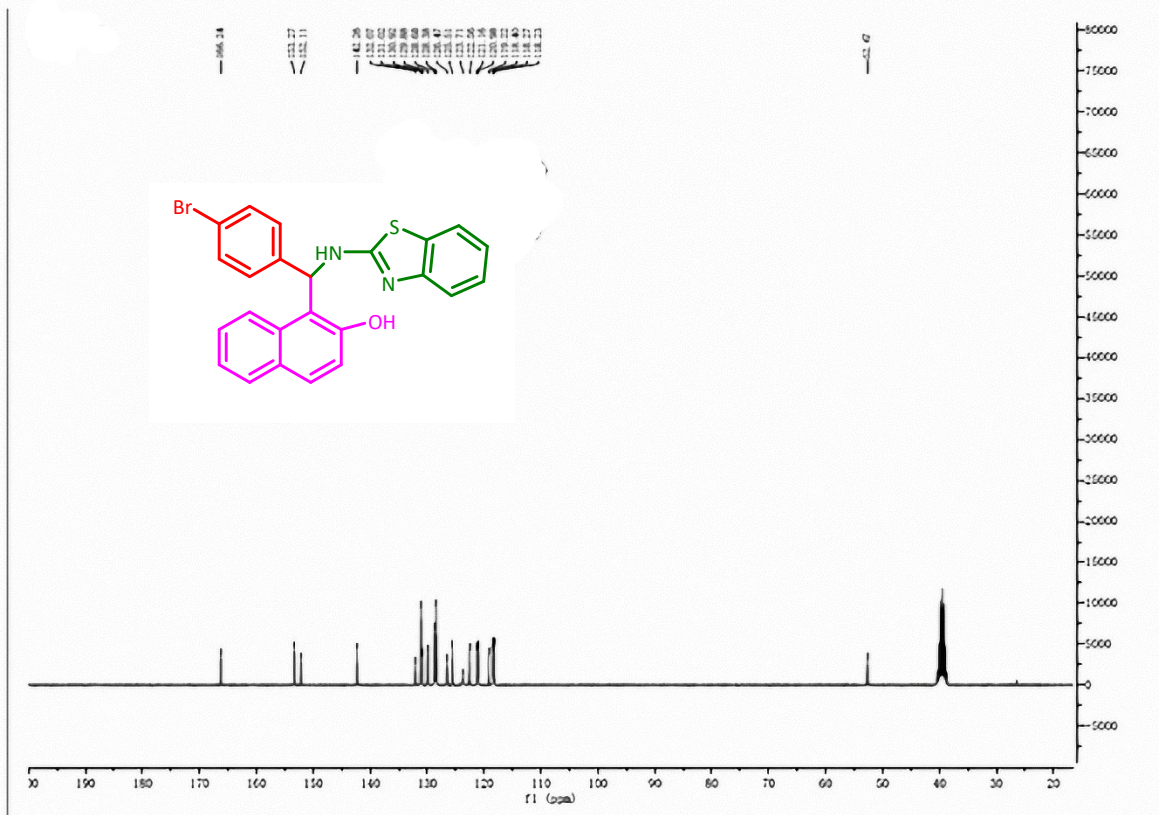

Figure 31: The  $^{13}\text{C}$  NMR spectrum of 1-((benzo[d]thiazol-2-ylamino)(4-bromophenyl)methyl)naphthalen-2-ol.

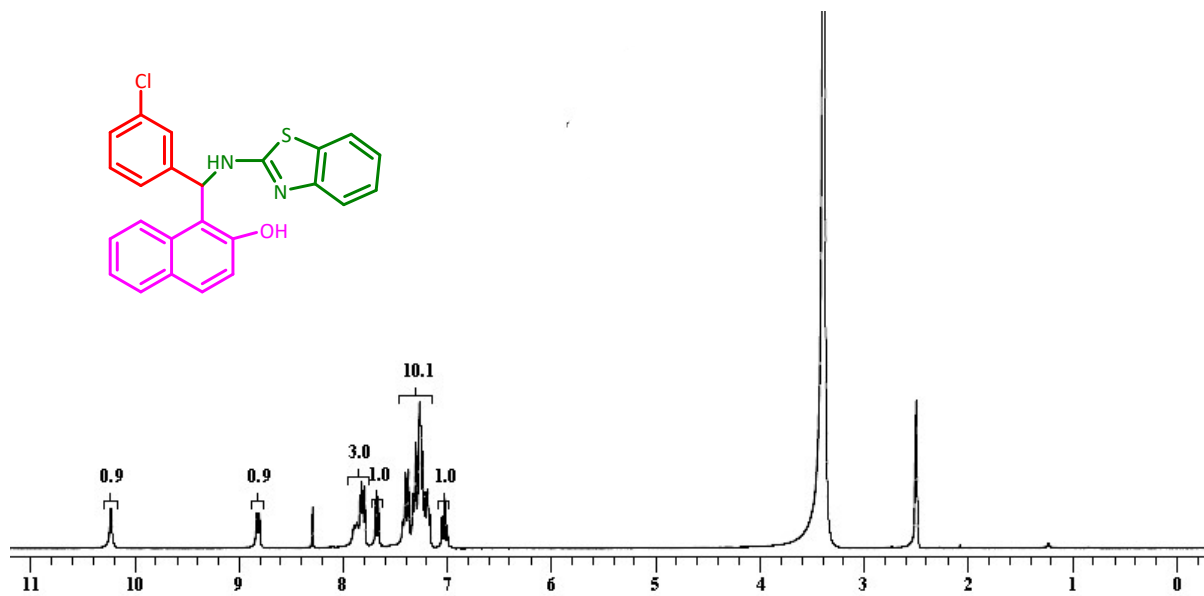

Figure 32: The <sup>1</sup>H NMR spectrum of 1-((benzo[d]thiazol-2-ylamino)(3-chlorophenyl)methyl)naphthalen-2-ol.



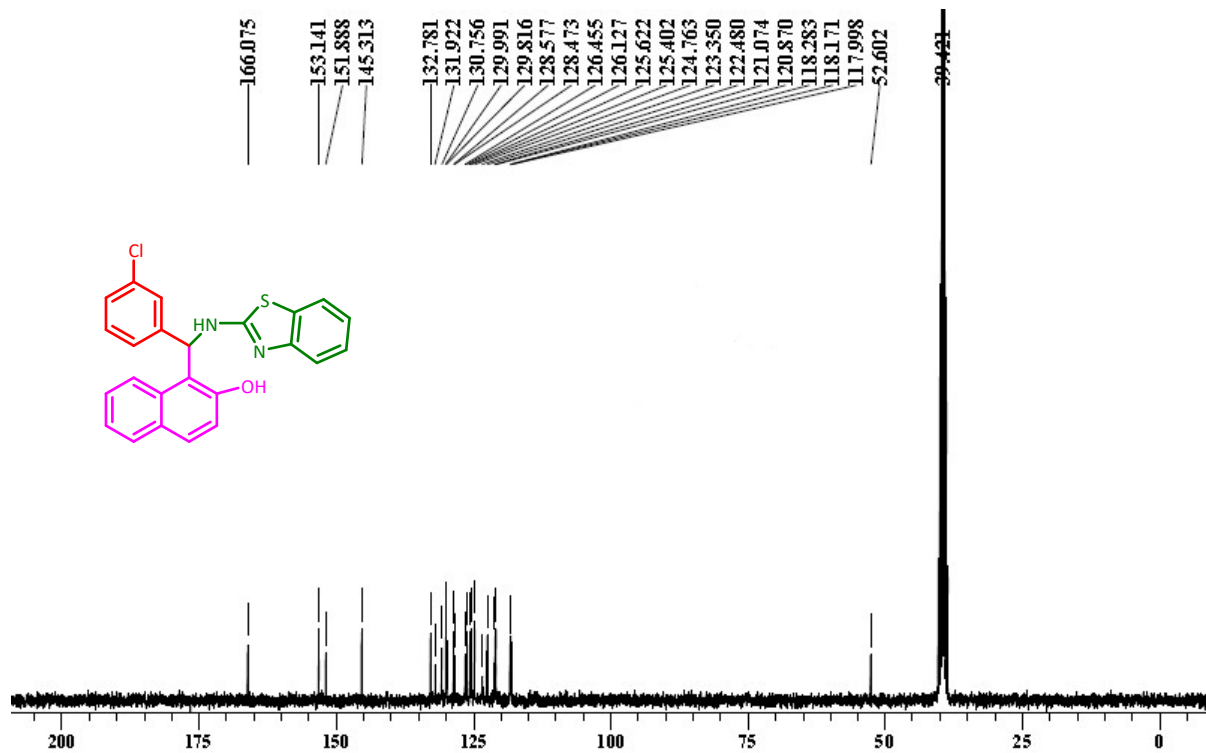

Figure 33: The  $^{13}\text{C}$  NMR spectrum of 1-((benzo[d]thiazol-2-ylamino)(3-chlorophenyl)methyl)naphthalen-2-ol.

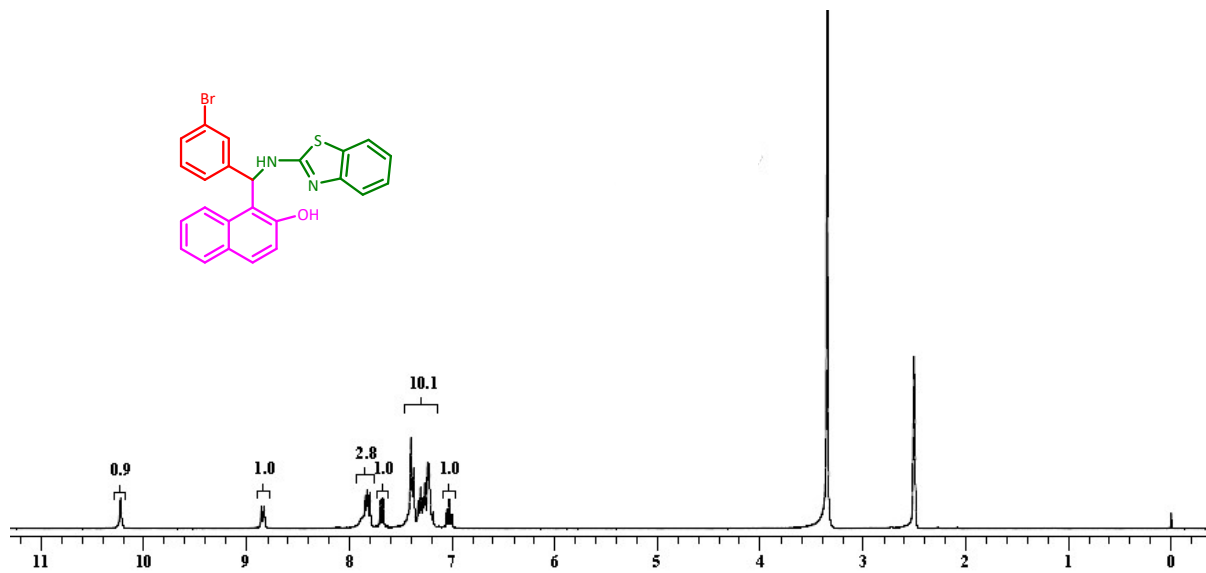

Figure 34: The <sup>1</sup>H NMR spectrum of 1-((benzo[d]thiazol-2-ylamino)(3-bromophenyl)naphthalen-2-ol.

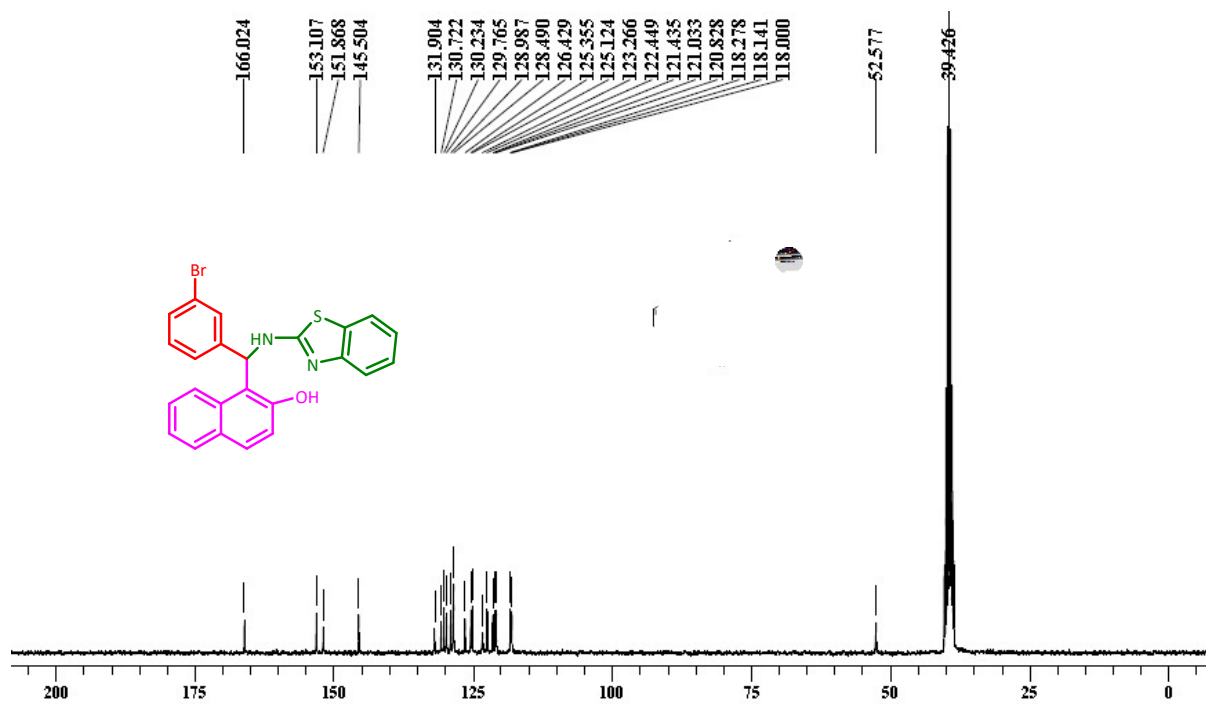

Figure 35: The <sup>13</sup>C NMR spectrum of 1-((benzo[d]thiazol-2-ylamino)(3-bromophenyl)naphthalen-2-ol.

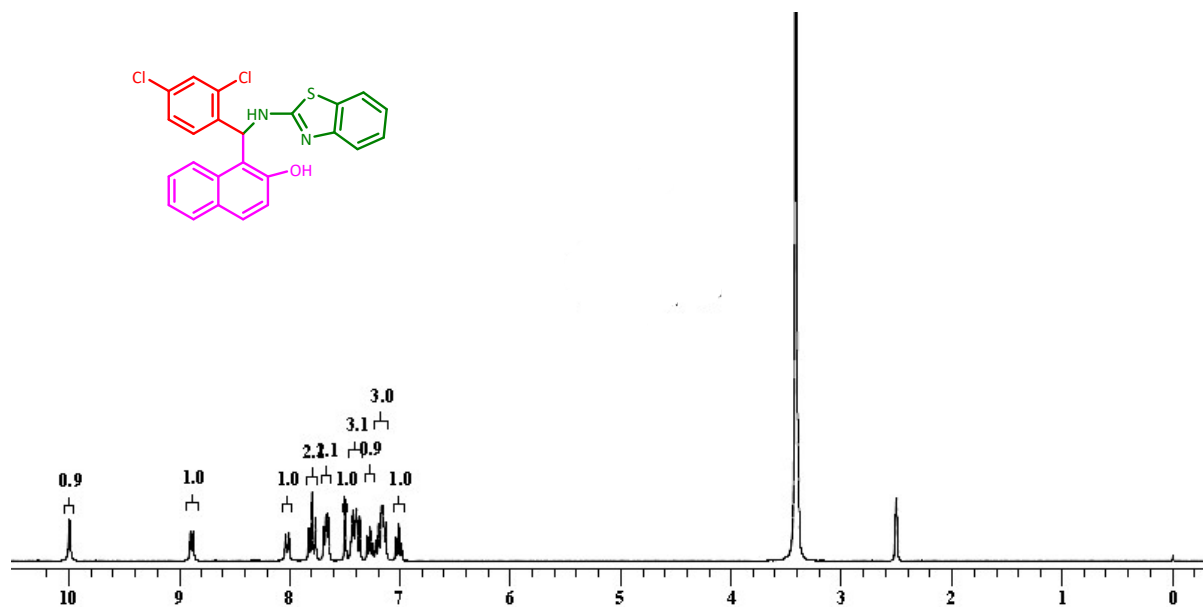

Figure 36: The <sup>1</sup>H NMR spectrum of 1-((benzo[d]thiazol-2-ylamino)(2,4-dichlorophenyl)methyl) naphthalen-2-ol.

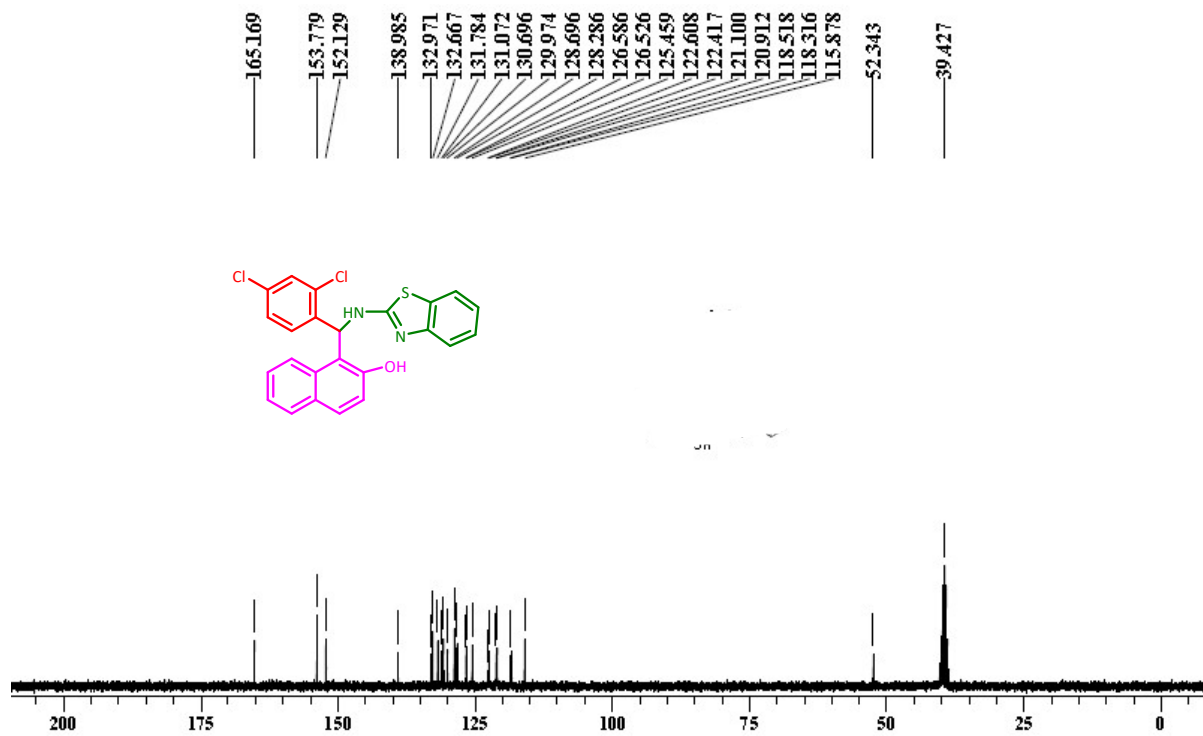

Figure 37: The <sup>13</sup>C NMR spectrum of 1-((benzo[d]thiazol-2-ylamino)(2,4-dichlorophenyl)methyl) naphthalen-2-ol.

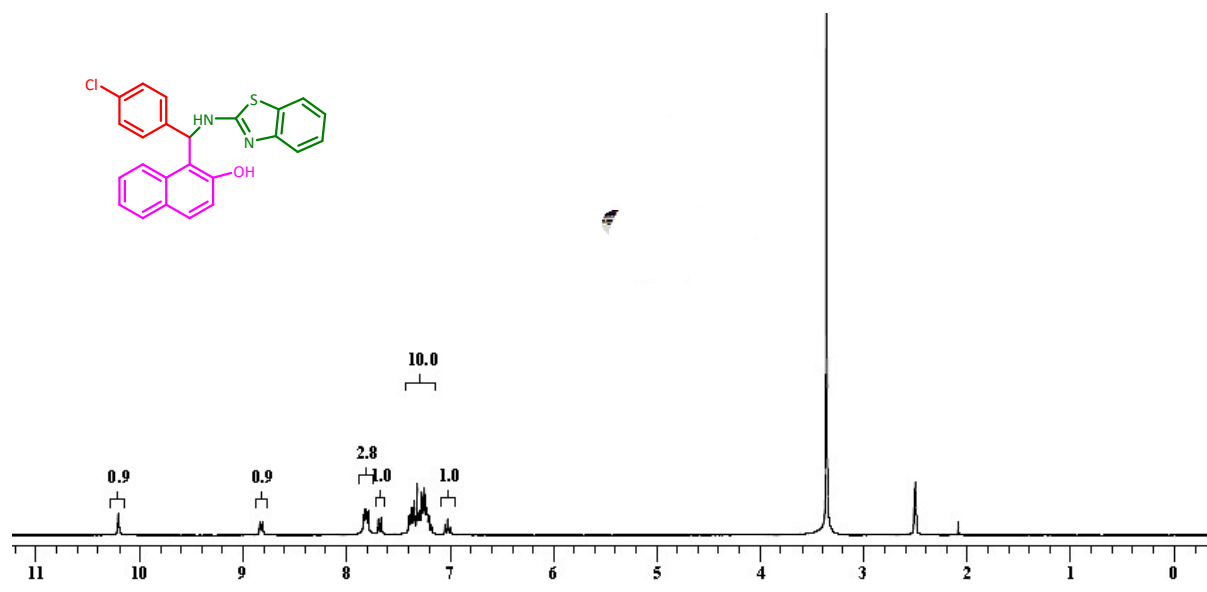

Figure 38: The <sup>1</sup>H NMR spectrum of 1-((benzo[d]thiazol-2-ylamino)(4-chlorophenyl)methyl)naphthalen-2-ol.

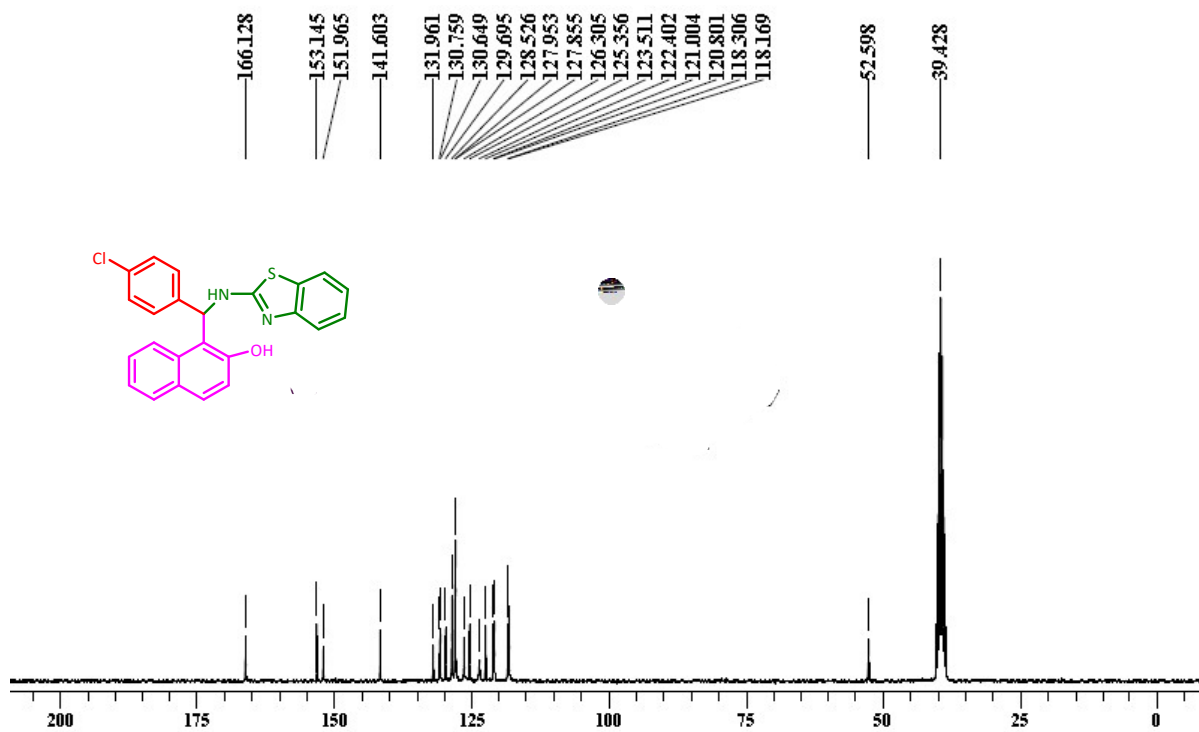

Figure 39: The <sup>13</sup>C NMR spectrum of 1-((benzo[d]thiazol-2-ylamino)(4-chlorophenyl)methyl)naphthalen-2-ol.

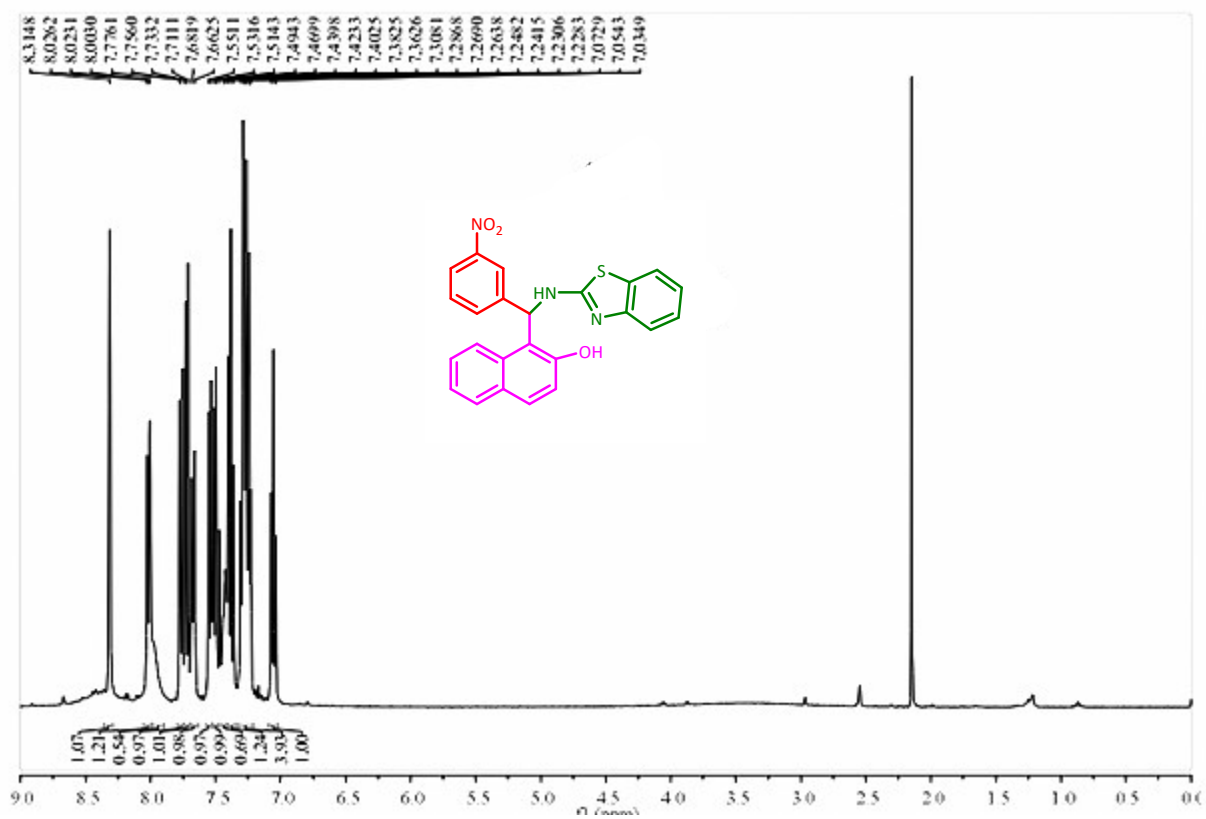

Figure 40: The <sup>1</sup>H NMR spectrum of 1-((benzo[d]thiazol-2-ylamino)(3-nitrophenyl)methyl)naphthalen-2-ol.



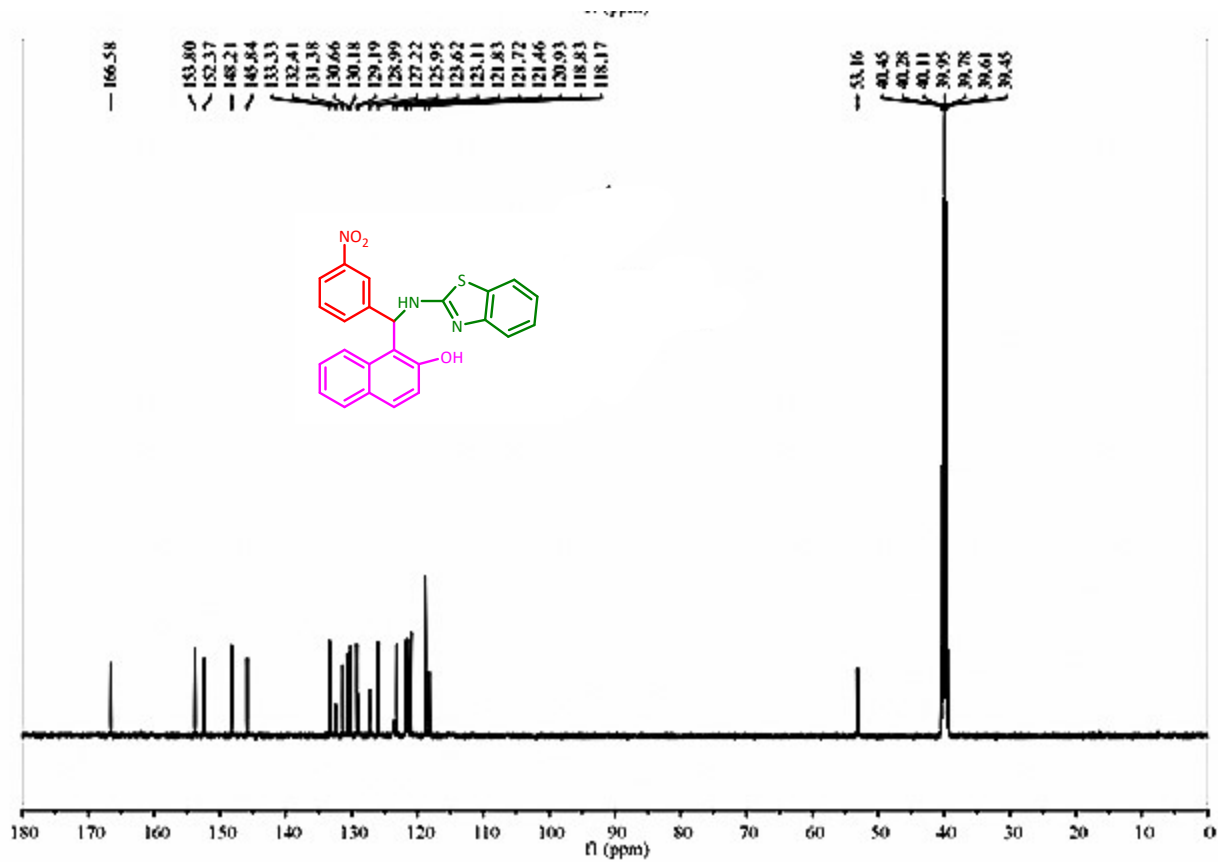

Figure 41: The  $^{13}\text{C}$  NMR spectrum of 1-((benzo[d]thiazol-2-ylamino)(3-nitrophenyl)methyl)naphthalen-2-ol.

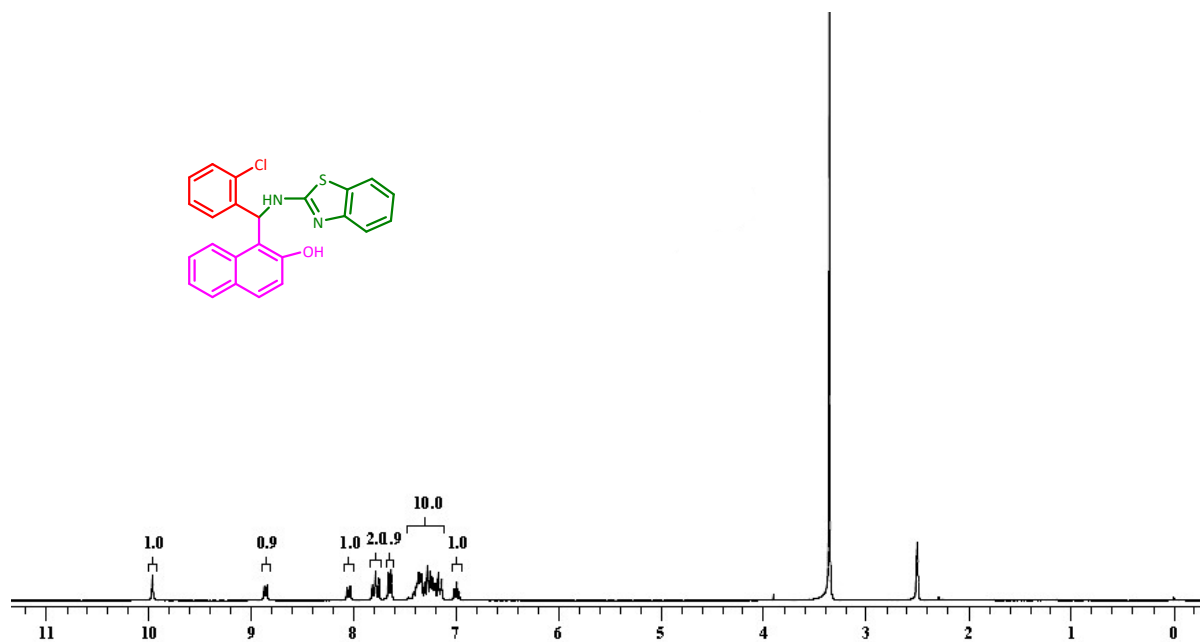

Figure 42: The <sup>1</sup>H NMR spectrum of 1-((benzo[d]thiazol-2-ylamino)(2-chlorophenyl)methyl)naphthalen-2-ol.

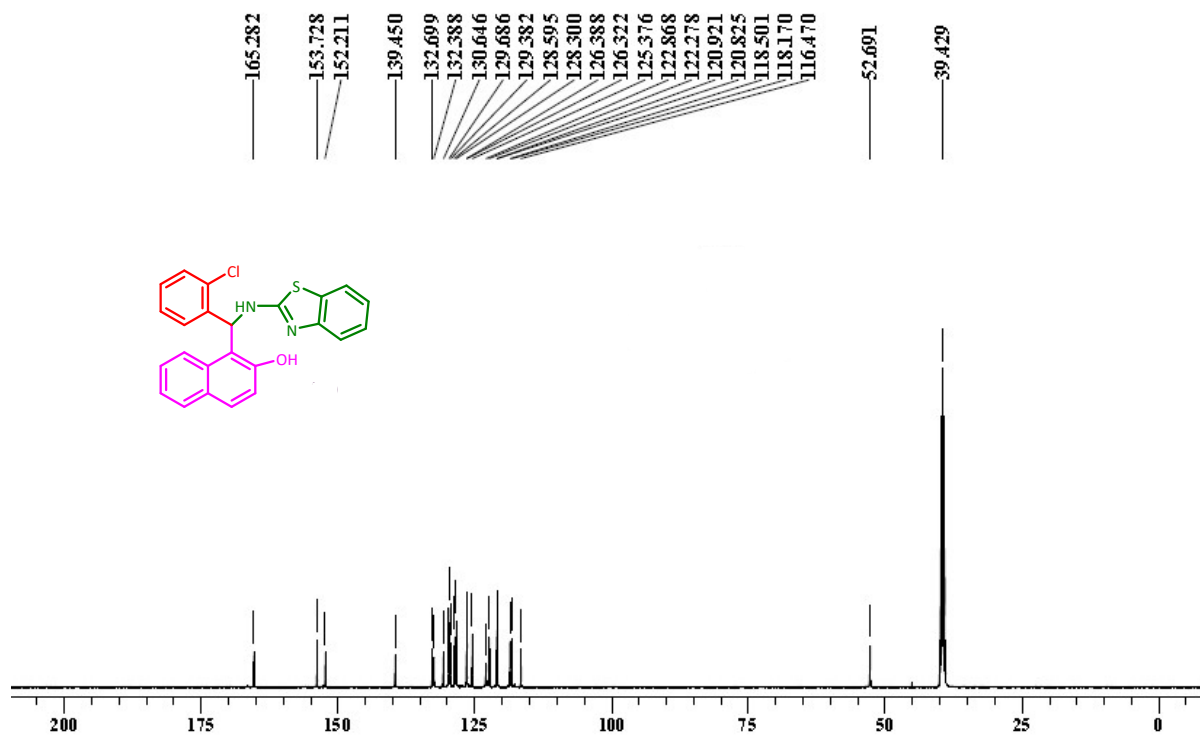

Figure 43: The <sup>13</sup>C NMR spectrum of 1-((benzo[d]thiazol-2-ylamino)(2-chlorophenyl)methyl)naphthalen-2-ol.
